# Grow with the flow: a latitudinal cline in physiology is associated with more variable precipitation in *Erythranthe cardinalis*

Christopher D. Muir<sup>1,\*</sup> and Amy L. Angert<sup>1,2</sup>

<sup>1</sup> Biodiversity Research Centre and Department of Botany, University of British Columbia, Vancouver, BC, Canada

<sup>2</sup> Department of Zoology, University of British Columbia, Vancouver, BC, Canada

\*corresponding author: Chris Muir, [chrismuir@gmail.com](mailto:chrismuir@gmail.com)

Running Head: Latitudinal cline and climate in *Erythranthe*

Key words: local adaptation, cline, photosynthesis, growth rate, monkeyflower, *Mimulus*

Data are currently available on GitHub and will be archived on Dryad upon publication.

## Acknowledgements

Erin Warkman and Lisa Lin helped collect data. CDM was supported by a Biodiversity Postdoctoral Fellowship funded by the NSERC CREATE program. ALA was supported by an NSERC Discovery Grant and a grant from the National Science Foundation (DEB 0950171). Four anonymous referees provided constructive comments on earlier versions of this manuscript.

# Grow with the flow: a latitudinal cline in physiology is associated with more variable precipitation in *Erythranthe cardinalis*

## Abstract

Local adaptation is commonly observed in nature: organisms perform well in their natal environment, but poorly outside it. Correlations between traits and latitude, or latitudinal clines, are among the most common pieces of evidence for local adaptation, but identifying the traits under selection and the selective agents is challenging. Here, we investigated a latitudinal cline in growth and photosynthesis across 16 populations of the perennial herb *Erythranthe cardinalis* (Phrymaceae). Using machine learning methods, we identify interannual variation in precipitation as a likely selective agent: Southern populations from more variable environments had higher photosynthetic rates and grew faster. We hypothesize that selection may favor a more annualized life history – grow now rather than save for next year – in environments where severe droughts occur more often. Thus our study provides insight into how species may adapt if Mediterranean climates become more variable due to climate change.

## Introduction

1 Local adaptation has been documented within numerous species; populations generally  
2 have higher fitness in their native environment, but perform poorly outside it (Schluter,  
3 2000; Leimu and Fischer, 2008; Hereford, 2009). However, the prevalence of local adapta-  
4 tion remains difficult to assess because researchers rarely test for local adaptation unless  
5 there are obvious phenotypic or environmental differences (but see Hereford and Winn  
6 2008). When local adaptation occurs, it frequently leads to clines in both phenotypes and

7 allele frequencies when selection varies over environmental gradients (Huxley, 1938; Endler,  
8 1977; Barton, 1999). Phenotypic differences between populations along a cline often have  
9 a genetic basis and can be studied in a common garden (Turesson, 1922; Clausen et al.,  
10 1940; Hiesey et al., 1942). Despite a long history of studying local adaptation and clines,  
11 it remains challenging to identify exactly which traits are under selection and which differ  
12 for nonadaptive reasons. In particular, the role that physiological differences play in local  
13 adaptation is poorly understood, despite the fact that physiology is frequently assumed to  
14 explain adaptation to the abiotic environment. A related problem is identifying which of  
15 the myriad and often covarying aspects of the environment cause spatially varying selective  
16 pressures.

17 When populations are locally adapted, reaction norms for fitness will cross, such that local  
18 genotypes have higher fitness than foreign genotypes and rank orders change across envi-  
19 ronments (Kawecki and Ebert, 2004). The traits that underlie local adaptation, however,  
20 need not mirror this pattern. Populations can have fixed genetic differences conferring  
21 trait values that are adaptive at home but neutral or maladaptive away. Alternatively,  
22 the ability to plastically respond to a particular environment or the magnitude of response  
23 to an environment could be adaptive. We distinguish between these patterns of adaptive  
24 trait differences by referring to ‘genetic variation’ in trait means and ‘genetic variation in  
25 plasticity’, respectively. Genetic variation in plasticity is synonymous with genotype-by-  
26 environment interactions, or simply ( $G \times E$ ). Genetic variation in trait means and plasticity  
27 are both involved in adaptation. For example, genetic variation in photoperiod responses  
28 (Blackman et al., 2011) and developmental rate (Stinchcombe et al., 2004) allow organisms  
29 to properly time their life history with the local environment. Conversely, sun and shade  
30 plants do not have intrinsically higher or lower rates of carbon assimilation, but rather,  
31 genetic variation in plasticity cause sun plants to assimilate more under high light and  
32 shade plants under low light (Givnish, 1988). In plants especially, we know little about the  
33 prevalence and adaptive significance of variation in fundamental physiological traits like

34 photosynthesis and their impact on plant performance (Flood et al., 2011).

35 A basic approach to identify candidate traits underlying local adaptation is to find asso-  
36 ciations between traits and environments. Either genetic variation in trait means and/or  
37 plasticity should vary clinally along environmental gradients. Indeed, clines in ecologically  
38 important traits are widespread in nature (Endler, 1977) and often adaptive, but in most  
39 cases the selective agent is unknown. For example, in *Drosophila* numerous latitudinal  
40 clines exist for traits like thermal tolerance (Hoffmann et al., 2002), body size (Coyne and  
41 Beecham (1987) and references therein), and life history (Schmidt et al., 2005). Some  
42 *Drosophila* clines have evolved multiple times (Oakeshott et al. (1982); Huey et al. (2000),  
43 see also Bradshaw and Holzapfel (2001)) or shifted in response to climate change (Umina  
44 et al., 2005), evincing climatic adaptation. Similarly, plant species exhibit latitudinal clines  
45 in traits like flowering time (Stinchcombe et al., 2004), cyanogenesis (Kooyers and Olsen,  
46 2012), leaf morphology (Hopkins et al., 2008; Stock et al., 2014), and drought resistance  
47 (Kooyers et al., 2015) that likely relate to climatic variation.

48 Despite the fact that latitudinal clines have been studied for a long time, latitude *per se*  
49 cannot be a selective agent. Latitude may be strongly correlated with one or two key  
50 climatic variables, such as temperature, precipitation, or growing degree-days. Latitude  
51 may also correlate with the strength of biotic interactions (Schemske et al., 2009) or other  
52 nonclimatic aspects of the environment, though as we explain below, we do not yet have  
53 compelling data that these are important in our study system. Hence, we focus on whether  
54 latitude could be an effective proxy for an underlying climatic driver, in which case we  
55 would expect a yet stronger relationship between traits and the key climatic variable(s)  
56 driving selection. Alternatively, latitude may be more strongly related to traits than any  
57 single climatic variable for at least two reasons. First, latitude may be correlated with  
58 several climatic agents of selection that are individually weak, but add up to a strong  
59 latitudinal cline. Alternatively, gene flow among neighbouring populations could smooth  
60 out local climatic effects, since alleles will experience selection across populations linked

61 by migration (Slatkin, 1978; Paul et al., 2011; Hadfield, 2016). We refer to this as the  
62 ‘climatic neighborhood’. For example, in mountainous regions average temperature at  
63 a given latitude varies widely, but in aggregate, a lower latitude set of populations will  
64 experience warmer climate than a higher latitude one. Thus, any particular low latitude  
65 population would be warm-adapted, even if it was located in a cooler (e.g. high elevation)  
66 site. Because many climatic factors vary latitudinally, and which climatic factors vary  
67 latitudinally changes over the earth’s surface (e.g. coastal vs. continental), dissecting the  
68 evolution of latitudinal clines across many species will help identify generalities, such as  
69 whether thermal tolerance maxima or seasonal timing is more important (Bradshaw and  
70 Holzapfel, 2008), and whether local or regional climate shapes selective pressures.

71 In this study, we investigated two major questions: 1) whether genetic variation in physi-  
72 ological trait means or plasticity corresponds with latitude; and 2) what climatic factor(s)  
73 could plausibly be responsible for latitudinal clines. Within question 2, we tested three  
74 hypotheses outlined in the previous paragraph: latitudinal clines are explained by a single  
75 dominant climatic factor, multiple climatic factors, or the climatic neighborhood expe-  
76 rienced by nearby population connected through gene flow. These hypotheses are not  
77 mutually exclusive since, for example, single or multiple factors in a climatic neighborhood  
78 may lead to latitudinal clines. We focused on climate because climate often determines  
79 where species are found and also can exert strong selection on populations within species.  
80 We acknowledge that other abiotic and biotic factors could contribute to selection and  
81 the overall pattern of local adaptation. Furthermore, there is a compelling need to know  
82 how populations are (or are not) locally adapted to climate so as to predict how they will  
83 respond to climate change (Aitken and Whitlock, 2013).

84 We examined these questions in *Erythranthe cardinalis* (formerly *Mimulus cardinalis* [Ne-  
85 som 2014]) because linking physiological traits to potentially complex patterns of local  
86 adaptation requires integrating multiple lines of evidence from comparative, experimental,  
87 and genomic studies under both lab and field conditions. Many classic and contemporary

88 studies of local adaptation use *Mimulus sensu lato* species because of their natural his-  
89 tory, easy propagation, and genetic/genomic resources (Clausen et al., 1940; Hiesey et al.,  
90 1971; Bradshaw and Schemske, 2003; Wu et al., 2008; Lowry and Willis, 2010; Wright  
91 et al., 2013). Yet, there is a deficiency of links between local adaptation and physiologi-  
92 cal mechanisms (Angert, 2006; Angert et al., 2008; Wu et al., 2010; Wright et al., 2013).  
93 We measured genetic variation in trait means and plasticity in response to temperature  
94 and drought among 16 populations distributed over 10.7° of latitude. We found a latitudi-  
95 nal cline of trait means in photosynthesis and growth, but little evidence for variation in  
96 plasticity. Interannual variation in precipitation and temperature are associated with this  
97 axis of variation, suggesting that climatic variance rather than mean may be an important  
98 driver of local adaptation in *E. cardinalis*. The climatic neighborhoods around populations  
99 explained trait variation better than local climate, indicating that latitudinal clines may be  
100 common because latitude integrates effects of selection on populations connected through  
101 gene flow. We place these findings in the context of life history theory and consider future  
102 directions in the Discussion.

## 103 **Material and Methods**

104 Data and annotated source code to reproduce these analyses and manuscript are available  
105 on GitHub (<https://github.com/cdmuir/card-cline>).

### 106 **Population Selection**

107 *E. cardinalis* is a perennial forb native to the Western US (California and Oregon). It is  
108 predominantly outcrossing, self-compatible, and pollinated primarily by hummingbirds.  
109 We used 16 populations from throughout the range of *E. cardinalis* (Table 1). These  
110 populations were intentionally chosen to span much of the climatic range of the species

111 based on all known occurrences (see below). Seeds were collected in the field from mature,  
112 undehisced fruit left open for 2-4 weeks to dry, then stored at room temperature. To  
113 control for maternal effects, we grew a large number of field-derived seeds in the greenhouse  
114 and generated seed families for this experiment by haphazardly crossing individuals from  
115 the same population. We selected seed families to maximize the number of field-derived  
116 individuals represented. Thus, we used seeds from 154 greenhouse-derived seed families,  
117 4–12 (mean = 9.6, median = 12) families per population.

**Table 1:** Latitude, longitude, and elevation (mas = meters above seal level) of 16 focal populations used in this study.

| Name                         | Latitude | Longitude | Elevation (mas) |
|------------------------------|----------|-----------|-----------------|
| Hauser Creek                 | 32.657   | -116.532  | 799             |
| Cottonwood Creek             | 32.609   | -116.7    | 267             |
| Sweetwater River             | 32.9     | -116.585  | 1180            |
| Grade Road Palomar           | 33.314   | -116.871  | 1577            |
| Whitewater Canyon            | 33.994   | -116.665  | 705             |
| Mill Creek                   | 34.077   | -116.873  | 2050            |
| West Fork Mojave River       | 34.284   | -117.378  | 1120            |
| North Fork Middle Tule River | 36.201   | -118.651  | 1314            |
| Paradise Creek               | 36.518   | -118.759  | 926             |
| Redwood Creek                | 36.691   | -118.91   | 1727            |
| Wawona                       | 37.541   | -119.649  | 1224            |
| Rainbow Creek                | 37.819   | -120.007  | 876             |
| Middle Yuba River            | 39.397   | -121.082  | 455             |
| Little Jamison Creek         | 39.743   | -120.704  | 1603            |
| Deep Creek                   | 41.668   | -123.11   | 707             |
| Rock Creek                   | 43.374   | -122.957  | 326             |

## 118 Plant propagation

119 On 14 April, 2014, 3-5 seeds per family were sown directly on sand (Quikrete Play Sand,  
120 Georgia, USA) watered to field capacity in RLC4 Ray Leach cone-tainers placed in RL98  
121 98-well trays (Stuewe & Sons, Inc., Oregon, USA). We used pure sand because *E. cardinalis*

122 typically grows in sandy, riparian soils (A. Angert, pers. obs.). Two jumbo-sized cotton  
123 balls at the bottom of cone-tainers prevented sand from washing out. Cone-tainers sat in  
124 medium-sized flow trays (FLOWTMD, Stuewe & Sons, Inc., Oregon, USA) to continuously  
125 bottom-water plants during germination in greenhouses at the University British Columbia  
126 campus in Vancouver, Canada (49°15' N, 123°15' W). Misters thoroughly wetted the top of  
127 the sand every two hours during the day. Most seeds germinated between 1 and 2 weeks,  
128 but we allowed 3 weeks before transferring seedlings to growth chambers. We recorded  
129 germination daily between one to two weeks after sowing, and every 2-3 days thereafter.  
130 On 5 May (21 days after sowing), we transferred seedlings to one of two growth chambers  
131 (Model E-15 Conviron, Manitoba, Canada). We thinned seedlings to one plant per cone-  
132 tainer, leaving the center-most plant. 702 of 768 (91.4%) had plants that could be used  
133 in the experiment. We allowed one week at constant, non stressful conditions (day: 20°C,  
134 night: 16°C) for plants to acclimate to growth chambers before starting treatments. The  
135 initial size of seedlings, measured as the length of the first true leaves, did not differ between  
136 populations, families, or treatments (Table S1).

### 137 **Temperature and drought treatments**

138 We imposed four treatments, a fully-factorial cross of two temperature levels and two  
139 watering levels. The temperature levels closely simulated an average growing season at the  
140 thermal extremes of the species range, which we designate as Hot and Cool treatments.  
141 Watering levels contrasted a perennial and seasonal stream, which we refer to as Well-  
142 watered and Drought treatments. A detailed description of treatments is provided in the  
143 Supplemental Materials and Methods and summarized in Fig 1. Because growth chambers  
144 cannot be subdivided, one chamber was assigned to the Hot treatment level and another  
145 to the Cool treatment level. Within each chamber, there were two Well-watered blocks  
146 and two Drought blocks. The photosynthetically active radiation in both chambers was



147 approximately  $400 \mu\text{mol quanta m}^{-2} \text{s}^{-1}$  and set to a 16:8 light:dark cycle to simulate  
 148 summer growing conditions. The growth chambers did not control humidity, but because  
 149 of watering and high plant transpiration rates, the relative humidity was quite high in both  
 150 temperature levels (data not shown). Lower humidity would have made the drought more  
 151 severe, but low soil moisture is stressful in and of itself. The total number of plants in  
 152 each treatment was:  $n_{\text{cool,dry}} = 169$ ;  $n_{\text{cool,ww}} = 174$ ;  $n_{\text{hot,dry}} = 176$ ;  $n_{\text{hot,ww}} = 183$ . Each  
 153 population had 8–12 individuals per treatment level (mean = 11, median = 11).

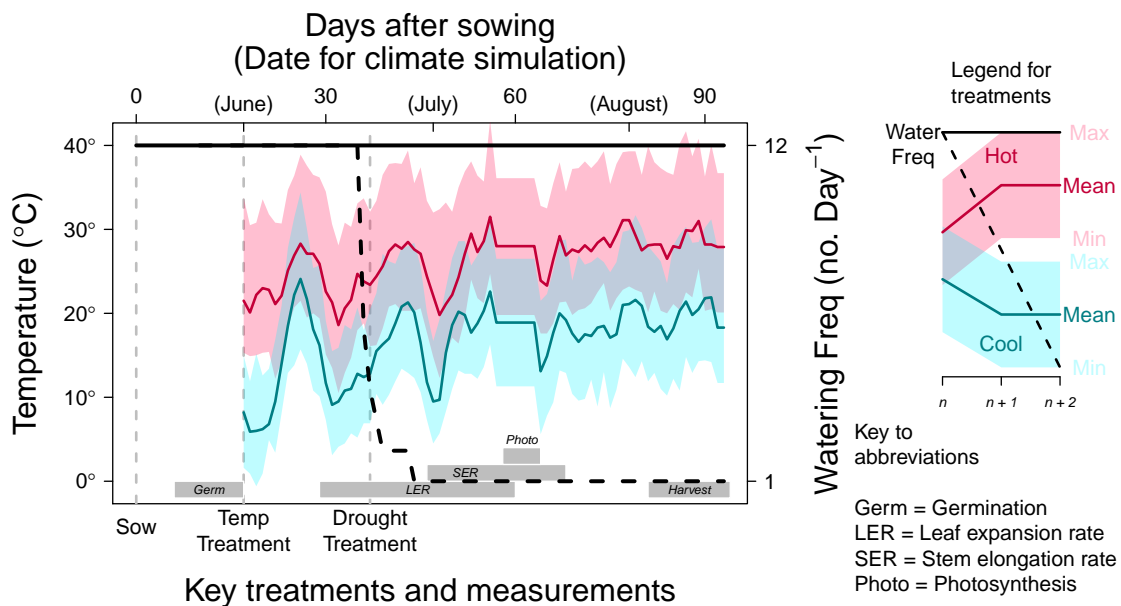

**Figure 1:** Overview of experimental treatments and timing of key trait measurements. All plants germinated within 21 days of sowing. At that time, we began temperature treatments (left axis), simulating a typical June–August weather pattern at Hot (red) and Cool (blue) sites. The bold lines track the average daily temperatures. Within each day, there was a maximum daytime temperature (top of translucent polygons) and minimum nighttime temperature (bottom of translucent polygons). The drought treatment commenced later by ramping down the frequency of bottom-watering episodes (dashed black line; right axis), while watering frequency was maintained in the control treatment (solid black line). Grey boxes on the bottom of the plot outline the period of key measurements described in the Material and Methods.

154 **Trait measurements**

155 We measured five traits in response to temperature and watering treatments (Table 2).

**Table 2:** Key traits measured in this study.

| Trait                | Units                                              |
|----------------------|----------------------------------------------------|
| Days to germination  | day                                                |
| Leaf expansion rate  | mm day <sup>-1</sup>                               |
| Stem elongation rate | cm day <sup>-1</sup>                               |
| Photosynthetic rate  | $\mu\text{mol CO}_2 \text{ m}^{-2} \text{ s}^{-1}$ |
| Mortality            | probability of death                               |

156 **Days to germination** We tested for population variation in germination rate, measured  
157 as Days to Germination, using a lognormal survival model fit using the survreg function  
158 in the R package **survival** version 2.38 (Therneau, 2015). We treated Population as a fixed  
159 effect and Family as random effect using a  $\Gamma$  frailty function. Statistical significance of the  
160 Population effect was determined using analysis of deviance. Note that, unlike other traits  
161 discussed below, we did not include Block, Treatment, or Population  $\times$  Treatment inter-  
162 actions because during germination plants had not been placed into blocks and treatments  
163 had not yet been applied.

164 **Growth rate: leaf expansion and stem elongation** We measured growth rate dur-  
165 ing two phases: leaf expansion and stem elongation. Growth measurements were taken  
166 during the early vegetative stage. We censused leaf length twice per week shortly after  
167 the emergence of true leaves from 12 May – 12 June (28–59 days after sowing), resulting  
168 in 10 measurements. We ceased measuring leaf length once it appeared to asymptote and  
169 growth shifted to stem elongation. We also censused plant height on 7 occasions (twice  
170 per week) between 29 May and 20 June (45 to 67 days after sowing) until plants began  
171 to initiate floral buds. Thus all growth measurements occurred during the vegetative, pre-

172 reproductive phase. Both leaf expansion and stem elongation were modelled separately  
173 as second-order polynomials. We used empirical Bayes' estimates of growth for each indi-  
174 vidual plant from linear mixed-effects models fit with the R package **lme4** version 1.1-12  
175 (Bates et al., 2015).

176 **Photosynthesis** During the week of 10 to 16 June (57 to 63 days after sowing), we  
177 measured daytime photosynthetic rate on a subset of 329 plants evenly spread between  
178 treatments and families within populations. The youngest, fully-expanded leaf acclimated  
179 for 3 minutes to reach steady state in a 6-cm<sup>2</sup> chamber of a LI-COR 6400XT Portable Pho-  
180 tosynthesis System (LI-COR Biosciences, Lincoln, Nebraska). We made all measurements  
181 at ambient light (400  $\mu\text{mol m}^{-2} \text{s}^{-1}$  of photosynthetically active radiation), atmospheric  
182 CO<sub>2</sub> (400 ppm), temperature, and moderate relative humidity. All measurements were  
183 taken between 9:00 AM and 5:00 PM (3 hours after lights turned on and 5 hours before  
184 lights turned off). During this period, we suspended normal day-to-day temperature fluc-  
185 tuations and set daytime temperatures to the average for that period (Cool: 26.5°; Hot:  
186 36.1°) so that all plants within a temperature level could be measured under the same con-  
187 ditions. We measured photosynthesis after dry down had progressed to assess differences  
188 in photosynthetic responses to drought.

189 **Mortality** We assayed mortality during twice-weekly growth measurements. We ana-  
190 lyzed the probability of surviving until the end of the experiment as a function of popula-  
191 tion, treatment, and their interactions using a Generalized Linear Mixed Model (GLMM)  
192 assuming binomially distributed errors. We included Family and Block as random effects.  
193 We assessed significance of fixed effects using Type-II Analysis of Deviance with Wald  $\chi^2$   
194 tests in the R package **car** (Fox and Weisberg, 2011).

## 195 Genetic variation in trait means and plasticity

196 For all traits (Table 2) except germination (see above), we tested for Population, Treatment  
197 (Temperature, Water, and Temperature  $\times$  Water), and Population  $\times$  Treatment interac-  
198 tions (Population  $\times$  Temperature, Population  $\times$  Water, and Population  $\times$  Temperature  $\times$   
199 Water). We interpreted significant Population effects to indicate genetic variation in trait  
200 means and Population  $\times$  Treatment interactions to indicate genetic variation in plastic-  
201 ity. As mentioned above, we used survival and GLMM models for germination rate and  
202 mortality, respectively. For all other traits, we used mixed model ANOVAs with Family  
203 and Block included as random factors. We fit models using restricted maximum likelihood  
204 in `lmer`, a function in the R package **lme4** (Bates et al., 2015). We determined significant  
205 fixed effect terms using a step-wise backward elimination procedure implemented with the  
206 step function in the R package **lmerTest** version 2.0-32 (Kuznetsova et al., 2016). We used  
207 Satterthwaite’s approximation to calculate denominator degrees of freedom for  $F$ -tests.  
208 We also included days to germination as a covariate in growth analyses. To ensure that  
209 Population and Treatment effects were specific to a particular growth phase, we included  
210 germination day as a covariate in leaf expansion and stem elongation analyses.

211 Failure to detect a significant effect could be the result of Type-2 error, so we complemented  
212 step-wise ANOVA (see above) by comparing effect sizes calculated in the full model. The  
213 full model contains all main effects, two-way interactions (Population  $\times$  Temperature,  
214 Population  $\times$  Water), a three-way interaction (Population  $\times$  Temperature  $\times$  Water), and  
215 random effects. For linear mixed-effects models (leaf expansion, stem elongation, and pho-  
216 tosynthesis) we used mean-squared error as a measure of effect size; for GLMM (mortality)  
217 we used  $\chi^2$  as a measure of effect size. We did not include germination rate because no  
218 Population  $\times$  Treatment effects were estimated. The difference in effect size of Population  
219 versus Population  $\times$  Treatment is:

$$\Delta \text{Effect Size}_{\text{Pop}-(\text{Pop} \times \text{Trt})} = \text{Effect Size}_{\text{Pop}} - \text{Effect Size}_{\text{Pop} \times \text{Trt}}$$

220 We calculated  $\Delta \text{Effect Size}_{\text{Pop}-(\text{Pop} \times \text{Trt})}$  for all two- and three-way Population  $\times$  Treat-  
221 ment interactions for each trait. To determine whether  $\Delta \text{Effect Size}_{\text{Pop}-(\text{Pop} \times \text{Trt})}$  was sig-  
222 nificantly different than 0, we calculated 95% confidence intervals using 1000 parametric  
223 bootstrap samples simulated from fitted models. If the 95% confidence interval for a given  
224  $\Delta \text{Effect Size}_{\text{Pop}-(\text{Pop} \times \text{Trt})}$ , was greater than zero then we concluded that the Population  
225 effect size was significantly larger than the Population  $\times$  Treatment effect size, and vice  
226 versa if the confidence interval was less than zero. If the confidence spanned zero, then  
227 the effect sizes are not significantly different.

## 228 **Principal components of germination, growth, and photosynthesis**

229 For each single-trait model above, we extracted the Population coefficient (factoring out  
230 Treatment and other effects). The multivariate distribution of these coefficients was then  
231 summarized using principal components analysis. The first principal component of these  
232 traits (TraitPC1) loaded positively with germination, growth, and photostynthetic rate,  
233 therefore we define this as a phenotypic axis delineating fast to slow growth.

## 234 **Identifying putative selective agents**

235 Latitudinal clines are common, but it is often difficult to ascribe this variation to a par-  
236 ticular selective agent. To reiterate, we tested three non-mutually exclusive hypotheses  
237 about how such latitudinal clines emerge: 1) one or two climatic variables explain latitudi-  
238 nal trait variation; 2) latitude is a proxy for multiple climatic factors that together shape  
239 trait variation; and 3) latitude integrates selection in a broader climatic neighborhood. We  
240 found that a population's position along TraitPC1 correlated strongly with the latitude of

241 origin (see Results) and next used Random Forest regression (Liaw and Wiener, 2002) to  
242 identify putative climatic factors underlying trait-latitude associations in *E. cardinalis*. We  
243 reasoned that if we identified a single climatic factor that explained more trait variation  
244 than latitude, then this would suggest that factor is a key selective agent underlying the  
245 latitudinal cline (Hypothesis 1). On the other hand, if multiple climatic factors together  
246 are necessary to explain trait variation, then this would suggest that many climatic factors  
247 together have imposed selection for the latitudinal cline (Hypothesis 2). We hereafter refer  
248 to factors identified in this analysis as ‘Climate-TraitPC1’ variables.

249 To test Hypothesis 3 about climatic neighborhoods driving selection, we directly compared  
250 local with neighborhood climate. The logic is that if the climatic analysis can identify  
251 candidate climatic factors important for local adaptation, then stronger correlations with  
252 neighbourhood climate would suggest a role for gene flow. We used the immediate collection  
253 location for local climate. For climate neighborhoods, we sampled climate at 1000 random  
254 points (at 90-m resolution) within a 62-km radius buffer around the collection and took the  
255 average. We chose this buffer radius based on population genetic structure, as inferred from  
256  $\approx 25,000$  restriction-site associated SNPs among 49 populations from across the range (Paul  
257 et al., In review). Spatial autocorrelation in allele frequencies persists for 62 km. However  
258 radii of 10 km<sup>2</sup> and 100 km<sup>2</sup> resulted in similar outcomes (data not shown). Since *E.*  
259 *cardinalis* is found exclusively in riparian areas, we only selected points along streams using  
260 the National Hydrography Dataset (United States Geological Survey, 2015). Climatic  
261 means and variances (see below) were weighted by their climatic suitability as determined  
262 using a multimodel ensemble average of ecological niche models (Angert et al., 2016).  
263 In addition to comparing local and neighborhood climate, we compared the univariate  
264 correlation between local and neighborhood climate with TraitPC1 and Latitude using  
265 paired *t*-tests. We adjusted degrees of freedom to account for the fact that many climatic  
266 factors are highly correlated and not independent. Specifically, we calculated the effective  
267 number of independent climatic factors ( $M_{\text{eff}}$ ) using the formula  $M_{\text{eff}} = 1 + (M - 1)(1 -$

268  $\text{Var}(\lambda)/M$  (Chevrud, 2001), where  $M$  is the original number of climatic factors and  $\lambda$  are  
269 the eigenvalues of the correlation matrix of all climatic factors.

270 To help eliminate potentially spurious correlations between TraitPC1 and climate, we tested  
271 for overlap between climatic variables that best predict latitude of all *E. cardinalis* occur-  
272 rence records (see detail below), not just the 16 focal populations. We refer to these climatic  
273 factors as ‘Climate-Latitude’ variables. The logic is that climatic factors associated with  
274 both TraitPC1 and latitude for all populations are more likely to be important selective  
275 agents than climatic factors that happen to correlate with TraitPC1 but do not covary with  
276 latitude throughout the *E. cardinalis* range. If a climatic factor is driving the latitudinal  
277 cline in TraitPC1, then we expect that climatic factor will correlate strongly with lati-  
278 tude of occurrence localities. Therefore, we did not consider Climate-TraitPC1 variables  
279 to be candidate selective agents unless the same or very similar variable was found in the  
280 Climate-Latitude analysis. However, we do not interpret potential selective agents iden-  
281 tified in Climate-Latitude analyses alone, because the goal was to explain the latitudinal  
282 clines in traits, not all aspects of climate that vary with latitude.

283 We selected Climate-Latitude and Climate-TraitPC1 variables independently using Vari-  
284 able Selection Using Random Forest (VSURF) algorithm in the R package **VSURF** version  
285 1.0.3 (Genuer et al., 2016). Random Forest regression is useful for cases like ours when  
286 the number of potential predictors is similar to or greater than the number of observations  
287 (‘high  $p$ , low  $n$ ’ problem). VSURF is a multistep algorithm that progressively retains or  
288 eliminates variables based on their importance over regression trees in the forest. Variable  
289 importance is defined as the average amount a climate variable reduces mean-squared er-  
290 ror in the predicted response (TraitPC1 or Latitude), compared to a randomly permuted  
291 dataset, across all trees in the random forest (see Genuer et al. [2015] for further detail).  
292 Hence, VSURF automatically eliminates unimportant and redundant variables based on  
293 the data without having to arbitrarily choose among colinear climate variables before the  
294 analysis. We kept only variables selected for prediction, the most stringent criterion. We

295 visually depict how we selected climatic variables in Fig 2.

296 For Climate-Latitude analyses, we compiled a representative set of 356 recent (since 2000)  
297 known *E. cardinalis* occurrences from a comprehensive set of herbarium records and an  
298 exhaustive field survey in 2010-11 (Angert et al., 2016). These occurrences were thinned  
299 by 50% to correct for uneven sampling. For both Climate-TraitPC1 analyses (16 focal  
300 populations) and Climate-Latitude (many populations), we used a 90-m digital elevation  
301 model from HydroSHEDS (Lehner et al., 2006) to extract elevation. Monthly interpolated  
302 climate layers were calculated using ClimateWNA version 5.30 (Wang et al., 2012), which  
303 accurately downscales climate data specifically for the rugged topography of western North  
304 America. For each occurrence, we calculated bioclimatic variables using the biovars function  
305 in the R package **dismo** version 1.1-1 (Hijmans et al., 2016). We included 24 climatic  
306 factors, 9 from ClimateWNA and 15 bioclimatic variables (Table S2). The bioclimatic  
307 variables included all permutations of two climatic factors, temperature and precipitation,  
308 and six temporal scales (annual average, coldest quarter, warmest quarter, wettest quarter,  
309 driest quarter, or seasonality) as well as mean diurnal range, isothermality, and annual  
310 temperature range. For each variable, we calculated both a 30-year normal by averaging  
311 annual values between 1981 and 2010 and 30-year coefficient of variation, a standardized  
312 metric of interannual climatic variation. Temperatures were converted to Kelvin to be  
313 on a ratio scale appropriate for calculating the coefficient of variation (CV). In total, the  
314 VSURF algorithm selected among 96 climate variables: 24 climatic factors  $\times$  2 types (30-  
315 year average and CV)  $\times$  2 spatial scales (local and neighborhood).



316 **Results**

317 **A coordinated latitudinal cline in germination, growth, and photosynthe-**  
 318 **sis**

319 There are strong genetically-based trait differences in time to germination, growth, and  
 320 photosynthetic rate among populations of *E. cardinalis*, as evidenced by large and signif-  
 321 icant population effects for these traits (Table 3). A single principal component captured  
 322 71.6 % of the trait variation among populations, defining an axis of variation from fast to  
 323 slow growth. A population’s position along this axis strongly covaried with its latitude of  
 324 origin; southern populations grew faster than northern populations (Fig 3). There were  
 325 similar latitudinal clines for individual traits underlying PC1 (Figures S1 to S4).

**Table 3:** Summary of Population, Treatment, and Population  $\times$  Treatment effects. We used different statistical modeling for the diverse traits assayed – glmer: generalized linear mixed model using the R package **lme4** (Bates et al., 2015); lmer: linear mixed model using the R package **lme4** (Bates et al., 2015); survreg: survival regression using the R package **survival** (Therneau, 2015). Note that temperature and water treatments were imposed after germination, hence are not applicable to this trait. Complete analysis of variance/deviance tables for each trait are available in the Supporting Information. Key to statistical significance: \* $P < 0.05$ ; \*\*  $P < 0.01$ ; \*\*\*  $P < 0.001$

| Trait                            | Germination | Leaf expansion | Stem elongation | Photosynthesis | Mortality |
|----------------------------------|-------------|----------------|-----------------|----------------|-----------|
| Statistical model                | survreg     | lmer           | lmer            | lmer           | glmer     |
| Population                       | ***         | ***            | ***             | ***            |           |
| Temperature                      | NA          | ***            | ***             | **             | ***       |
| Water                            | NA          | *              |                 |                | ***       |
| Pop $\times$ Temp                | NA          |                |                 | *              |           |
| Pop $\times$ Water               | NA          | *              |                 |                |           |
| Temp $\times$ Water              | NA          |                |                 |                | ***       |
| Pop $\times$ Temp $\times$ Water | NA          |                |                 |                |           |

## 326 **Little evidence for variation in plasticity**

327 In contrast to the genetic variation in trait means described above, we found little evidence  
328 of G×E in *E. cardinalis*. There were only two statistically significant Population × Treat-  
329 ment interactions (Table 3, Fig. S5), but these were not strong compared to Population  
330 and Temperature effects. Otherwise, populations responded similarly to treatments: faster  
331 growth in the hot treatment, slower growth in the dry treatment, and high mortality in  
332 the hot, dry treatment (Table 3). Complete ANOVA tables are available in the Supporting  
333 Information (Tables S3 to S6).

334 The effect size of Population was significantly larger than that for Population × Treat-  
335 ment interactions (Fig. S6) in most cases. For leaf expansion, Population had a signifi-  
336 cantly larger effect size than Population × Treatment interactions in 2 of 3 comparisons  
337 (Fig. S6A). For stem elongation (Fig. S6B) and mortality (Fig. S6D), Population effect  
338 sizes were significantly larger than all Population × Treatment interactions. For Photosyn-  
339 thesis, Population and Population × Treatment effect sizes were not significantly different  
340 (Fig. S6C), presumably because we had a smaller sample size.

## 341 **Neighborhood climatic variability best explains latitudinal cline**

342 Interannual variation in climate averaged over each populations's climatic neighborhood  
343 correlated most strongly with trait variation and latitude of *E. cardinalis* occurrences  
344 (Fig. 4, Table S7). All 16 Climate-Latitude and 3 Climate-TraitPC1 variables were neigh-  
345 borhood rather than local variables (Fig. 4). In fact, neighborhood climate almost always  
346 correlated better with TraitPC1 and Latitude than local climate (Fig. 5). On average,  
347 neighborhood Climate-TraitPC1 correlation coefficients were 0.16 higher than correlations  
348 with local-scale climate variables (paired *t*-test,  $t = 7.87$ , d.f. = 33.6,  $P = 3.94 \times 10^{-9}$ ).  
349 Likewise, neighborhood Climate-Latitude correlation coefficients were 0.13 higher than

350 those for local-scale climate (paired  $t$ -test,  $t = 6.71$ , d.f. = 36.8,  $P = 7.22 \times 10^{-8}$ ). Among  
351 Climate-Latitude and Climate-TraitPC1 variables, neighborhood climatic variability over  
352 30 years (1981–2010) in either winter precipitation (bio16 $_{\sigma}$ ) and/or temperature (bio11 $_{\sigma}$ )  
353 are the strongest candidates to explain the latitudinal cline in *E. cardinalis* (see Table S2  
354 for a key to climate variable abbreviations). Note that the coefficient of variation of a  
355 climatic factor is subscripted with  $\sigma$  whereas the mean is subscripted with  $\mu$ . More specif-  
356 ically, greater winter precipitation variability and lower winter temperature variability are  
357 associated with Southern latitudes and higher TraitPC1 values (Fig. 6A,B). Neighborhood  
358 interannual variation in winter precipitation (bio16 $_{\sigma}$ ) was the most important Climate-  
359 Latitude variable (Fig. 4A). However, neighborhood bio16 $_{\sigma}$  did not overlap with Climate-  
360 TraitPC1 variables (Fig. 4B). We nevertheless consider it a plausible candidate for two  
361 reasons. First, neighborhood bio16 $_{\sigma}$  correlated strongly with TraitPC1 (Fig. 6A). Second,  
362 one of the most important Climate-TraitPC1 variables (neighborhood bio15 $_{\sigma}$ ; Fig. 6B,C)  
363 is very similar to bio16 $_{\sigma}$ . In Mediterranean climates like California, most precipitation  
364 occurs in the wettest quarter (winter), so years with low winter precipitation also have  
365 low precipitation seasonality. Hence, highly variable year-to-year winter precipitation at  
366 lower latitude (Fig. 6D) is closely associated with large swings in precipitation seasonality  
367 (Fig. 6C).

368 Interannual variation in temperature of the coldest quarter (neighborhood bio11 $_{\sigma}$ ) is an-  
369 other plausible candidate because it was the only variable in both Climate-Latitude and  
370 Climate-TraitPC1 analyses (Fig. 4). Neighborhood bio11 $_{\sigma}$  explained more variation in  
371 TraitPC1 than latitude (latitude  $r^2 = 0.55$  vs. bio11 $_{\sigma}$   $r^2 = 0.6$ ; Fig. S7), whereas neigh-  
372 borhood bio16 $_{\sigma}$  did slightly worse (bio16 $_{\sigma}$   $r^2 = 0.49$ ). Models using bio15 $_{\sigma}$  or bio11 $_{\sigma}$  to  
373 predict TraitPC1 also had significantly lower Akaike Information Criteria (AIC) than the  
374 latitude model (AIC of different models – bio15 $_{\sigma}$ : 48.5; bio11 $_{\sigma}$ : 52.4; latitude: 54.5). The  
375 best two-factor model including both neighborhood bio15 $_{\sigma}$  and bio11 $_{\sigma}$  did not significantly  
376 improve explanatory power ( $r^2 = 0.71$ , AIC= 49.2). In summary, either variation in precip-

377 itation or temperature seasonality may be important selective agents, but there is no strong  
378 evidence that they are both important. The most important Climate-TraitPC1 variable,  
379 neighborhood variation in mean diurnal range ( $\text{bio2}_\sigma$ ; Fig. 4B) did not have any obvious  
380 similarity to Climate-Latitude variables. Given the large number of potential associations,  
381 we therefore think this may be a spuriously strong relationship.

## 382 Discussion

383 We found evidence for one of two common signatures of local adaptation in the perennial  
384 herb *Erythranthe cardinalis*. Latitudinal clines in germination rate, photosynthesis, and  
385 growth suggest adaptive differentiation in important physiological traits of the species.  
386 However, we caution that these are candidate adaptive traits and that we cannot yet rule  
387 out nonadaptive demographic processes such as a recent range expansion toward higher lat-  
388 itude (Paul et al., In review; Sheth and Angert, 2017). In contrast, we found little evidence  
389 for variation in plasticity to temperature or drought. Due to low replication within families,  
390 we did not have power to assess within-population genotype-by-environment interactions,  
391 which may be present. As we discuss below, low variation in plasticity among popula-  
392 tions may indicate that some dimensions of the fundamental abiotic niche are relatively  
393 conserved. Note that statistical power to detect significant plasticity is lower than that  
394 for differences in trait means, but the effect size of variation in plasticity was significantly  
395 less than that for trait means in most cases (Fig. S6). Finally, our results suggest that  
396 neighborhood-scale climate and interannual variation are more important selective agents  
397 than local averages. In the paragraphs that follow, we tie these results into the broader  
398 threads of evolutionary theory that might help explain why variation in physiological trait  
399 means changes clinally, whereas plastic responses to temperature and drought are relatively  
400 static. One caveat to bear in mind is that we are limited by the size of the climate grid  
401 ( $\approx 90 \text{ m}^2$ ) and therefore unable to detect very fine-scale local adaptation.

402 Evolutionary theory indicates that the shape of fitness tradeoffs, demography, and gene flow  
403 can constrain adaptation (Levins, 1968; Ronce and Kirkpatrick, 2001; Lenormand, 2002)  
404 and hence the type of variation maintained within species. Specifically, adaptive variation  
405 can be maintained by spatially varying selection if tradeoffs are not too strong, demography  
406 is symmetric, and/or maladaptive gene flow is low. Strong tradeoffs can prevent local  
407 adaptation in spatially variable environments because selection favors habitat specialists  
408 that track a specific habitat regardless of its frequency in the environment (Levins, 1968).  
409 For example, a riparian specialist may experience similar selection in rivers of high rainfall  
410 regions and deserts, even though the habitat is much rarer in the latter. In *E. cardinalis* we  
411 found substantial genetically based variation among populations along a phenotypic axis  
412 from fast to slow growth that varied over a large spatial scale (Fig. 3). If this variation  
413 is adaptive, it suggests one of several possibilities to investigate in the future: the fitness  
414 tradeoff between low versus high latitude environments is not too strong nor swamped  
415 by demographic asymmetry or maladaptive gene flow. That is, alleles favoured at one  
416 latitude are not strongly selected against when they flow to another population, allowing  
417 locally adaptive genetic variation to be maintained by spatially heterogeneous selection.  
418 We also know from previous work that population size does not vary strongly with latitude  
419 (Angert, unpub. data). Gene flow appears to be high, but attenuates at broad spatial  
420 scales, especially between southern ( $< 35^{\circ}\text{N}$ ) and northern portions of the range (Paul  
421 et al., In review).

422 Nevertheless, local gene flow from similar environments may shape how selection varies  
423 with latitude. Theory predicts that populations will not be perfectly adapted to their  
424 immediate habitat when there is gene flow from surrounding populations with different  
425 optima (Lenormand, 2002). With spatial heterogeneity and gene flow, traits will not covary  
426 perfectly with the local optimum (Slatkin, 1978; Paul et al., 2011; Hadfield, 2016), but  
427 should instead better match the average environment experienced by nearby populations  
428 connected through gene flow, which we refer to as the climatic neighborhood. Gene flow

429 and spatial heterogeneity may therefore be important in maintaining genetic variation  
430 (Yeaman and Jarvis, 2006). As this hypothesis predicts, climatic neighborhoods (62-km  
431 buffer around populations) correlated with traits and latitude of occurrences better than  
432 local climate (Fig. 4). We interpret this as suggestive evidence that gene flow between  
433 neighboring *E. cardinalis* populations shapes selection – populations are locally adapted to  
434 prevailing climate in their neighborhood, but perhaps not perfectly adapted to their local  
435 climate. This may not greatly constrain local adaptation because local and neighborhood  
436 climate values were generally similar in *E. cardinalis* populations (Fig. 5), at least at the  
437 resolution of ClimateWNA (90 m<sup>2</sup>). Therefore, we would predict in reciprocal transplants  
438 that populations whose local climate is farther from their neighborhood average would be  
439 less well adapted than those close to their neighborhood average.

440 It is reasonable to predict that southern populations, which appear to experience more  
441 frequent drought years (see below), might have physiological adaptations to respond to  
442 drought stress to survive and grow in drier soil. We found little evidence for this type of  
443 drought tolerance; all populations responded to drought and temperature similarly (Ta-  
444 ble 3). Plants grew faster in the Hot treatment, but there was little effect of drought on  
445 growth. Rather, the effects of drought took longer to materialize but resulted in high mor-  
446 tality, especially in the Hot treatment. However, there was no differential mortality among  
447 populations in this treatment. Although our results indicate that this axis of the species  
448 niche may be constrained, plants have multiple ways to resist drought through both toler-  
449 ance and escape (Ludlow, 1989; Kooyers, 2015). Next, we consider why drought tolerance  
450 may be less important in local adaptation than a form of escape for this species.

451 We hypothesize that tolerance to dry soil may be constrained by a combination of strong  
452 fitness tradeoffs, demographic asymmetry, and gene flow. Soil moisture in riparian habitats  
453 where *E. cardinalis* lives is highly heterogeneous at very small spatial scales (several me-  
454 ters). Plants in the stream never have to tolerate drought whereas plants only a few meters  
455 away may experience extreme drought since there is little direct precipitation during the

456 growing season in Mediterranean climates of western North America. We hypothesize that  
457 alleles conferring greater drought tolerance may be quite costly in well-watered soils, and  
458 *vice versa*, leading to strong fitness tradeoffs. Such tradeoffs would promote specialization  
459 to one soil moisture or another, thereby inhibiting the evolution of broad environmental tol-  
460 erance within a population. Demography and gene flow may reinforce niche conservatism.  
461 A new mutant with increased drought tolerance that could survive at the resource-poor  
462 margin of a population would likely be demographically overwhelmed by the larger census  
463 populations that can be maintained in higher-resource environments. Infrequent wet years  
464 may also produce most seeds, so selection is weighted towards alleles that have high fit-  
465 ness in the wet environment, even if dry years are more frequent (Templeton and Levin,  
466 1979; Brown and Venable, 1986). However, demographic asymmetry should equally hin-  
467 der the evolution of both drought tolerance and escape, so it should not explain why one  
468 mechanism evolves but not the other. Finally, gene flow, which is generally high among  
469 *E. cardinalis* populations within the same ecoregion (Paul et al., In review), will thwart  
470 local adaptation and reinforce specialization. Thus, the spatial grain of the environment,  
471 demographic asymmetry, and gene flow may conspire to constrain local adaptation along  
472 this environmental axis. Consistent with this hypothesis, recent record-setting droughts  
473 have caused the decline or even local extinction of some natural populations of *E. cardinalis*  
474 (Sheth and Angert, 2017).

475 In sum, these results indicate that genetic differences in physiology and growth are better  
476 candidates than plastic responses to temperature and drought as mediators of local adap-  
477 tation to climate in *E. cardinalis*. Next, we would like to understand why variation in  
478 these particular traits may be adaptive. We argue that temporally more variable environ-  
479 ments, as experienced by southern populations, select for a more ‘annualized’ life-history  
480 strategy, a form of drought escape. Demographic observations in natural populations of *E.*  
481 *cardinalis* reveal that southern populations tend to flower earlier at a smaller size, while  
482 northern populations invest more in vegetative growth (Sheth and Angert, 2017). In this

483 experiment, the fastest growing plants began producing flowers in  $\sim 60$  days (data not  
484 shown), suggesting that rapid vegetative develop may likewise affect flowering time. The  
485 association between position along the ‘fast-slow’ continuum and associated traits in *E.*  
486 *cardinalis* is similar to interspecific relationships between growth, functional traits, and  
487 life history (Adler et al., 2014; Salguero-Gómez et al., 2016). However, we cannot exclude  
488 unexplored factors (e.g. edaphic conditions, competitors, pollinators, etc.) which may also  
489 contribute to the latitudinal cline.

490 Greater investment in aboveground growth, as opposed to belowground storage for future  
491 seasons, may be favoured in climates with more frequent drought years, but maladaptive  
492 in climates with more consistent precipitation. In a stable environment where winter  
493 survivorship is assured in most years, failure to store resources may reduce lifetime fitness.  
494 But for perennial herbs in Mediterranean climates, a dry winter (rainy season) can kill the  
495 rhizomes (underground stems that store nutrients for future growth) before emergence or  
496 aboveground stems before flowering. If drought years occur frequently enough, selection  
497 may favour the fast-growing strategy because there is no advantage to storage if drought  
498 kills plants before flowering. Considering life-history strategy as a continuum from no  
499 storage (annual) to lots of storage (perennial), we hypothesize that the optimal allocation to  
500 aboveground growth is more ‘annualized’ in southern climates that have greater interannual  
501 variation in precipitation. This is a form of drought escape in that plants are investing more  
502 reproduction in the present to avoid possible drought in subsequent years, but is distinct  
503 from classic drought escape syndromes in which plants speed up development early in the  
504 season before the onset of drought.

505 The hypothesis that greater precipitation variability selects for an annualized life history is  
506 tentative, but consistent with theory and data from other species. Life history theory shows  
507 that less variable environments are one factor that favours the evolution of perenniality  
508 (Stearns, 1976; Iwasa and Cohen, 1989; Friedman and Rubin, 2015). Populations of the  
509 perennial *Plantago asiatica* show a similar latitudinal cline in growth and allocation to



510 storage (Sawada et al., 1994) but attribute the cline to variation in growing season length.  
511 There are also life history clines in the closely related species *E. guttata*, but the underlying  
512 traits and climatic drivers are quite different. Annual *E. guttata* flower sooner and produce  
513 fewer stolons in response to climates with shorter seasons and more intense summer drought  
514 (Lowry and Willis, 2010; Friedman et al., 2015; Kooyers et al., 2015). In contrast, there are  
515 no truly annual (monocarpic and semelparous) populations of *E. cardinalis*. Rather, our  
516 hypothesis states that climatic variability selects on quantitative variation in allocation to  
517 growth versus storage.

518 In summary, we found evidence for a coordinated latitudinal cline in germination rate,  
519 photosynthesis, and growth, suggesting local adaptation. We therefore predict to find dif-  
520 ferent optima for these traits in different climates. We did not find evidence that the  
521 relative performance of populations shifts with temperature or watering regime, suggesting  
522 relatively little variation in plasticity. Exploratory analysis implicate that more variable  
523 precipitation regimes at lower latitude could drive much of the latitudinal cline, though  
524 other climatic factors could also contribute. Interestingly, the climatic neighborhood may  
525 shape selective pressures more than local climate. In the future, we will use field exper-  
526 iments to test whether greater variation in precipitation selects for faster growth and if  
527 selection on temperature/drought responses does not vary among populations. By doing  
528 so, we aim to understand why certain physiological and developmental mechanisms, but  
529 not others, contribute to local adaptation.

## 530 **References**

531 Adler, P. B., R. Salguero-Gómez, A. Compagnoni, J. S. Hsu, J. Ray-Mukherjee, C. Mbeau-  
532 Ache, and M. Franco, 2014. Functional traits explain variation in plant life history  
533 strategies. *Proceedings of the National Academy of Sciences of the United States of*  
534 *America* 111:740–745.

- 535 Aitken, S. N. and M. C. Whitlock, 2013. Assisted gene flow to facilitate local adaptation  
536 to climate change. *Annual Review of Ecology, Evolution, and Systematics* 44:367–388.
- 537 Angert, A. L., 2006. Demography of central and marginal populations of monkeyflowers  
538 (*Mimulus cardinalis* and *M. lewisii*). *Ecology* 87:2014–2025.
- 539 Angert, A. L., M. J. Bayly, S. N. Sheth, and J. R. Paul, 2016. Testing range-limit hypothe-  
540 ses using range-wide habitat suitability and occupancy for the scarlet monkeyflower  
541 (*Mimulus cardinalis*) .
- 542 Angert, A. L., H. Bradshaw Jr, and D. W. Schemske, 2008. Using experimental evolution  
543 to investigate geographic range limits in monkeyflowers. *Evolution* 62:2660–2675.
- 544 Barton, N. H., 1999. Clines in polygenic traits. *Genetics Research* 74:223–236.
- 545 Bates, D., M. Mächler, B. Bolker, and S. Walker, 2015. Fitting linear mixed-effects  
546 models using lme4. *Journal of Statistical Software* 67:1–48. URL [http://CRAN.R-](http://CRAN.R-project.org/package=lme4)  
547 [project.org/package=lme4](http://CRAN.R-project.org/package=lme4). R package version 1.1-7.
- 548 Blackman, B. K., S. D. Michaels, and L. H. Rieseberg, 2011. Connecting the sun to  
549 flowering in sunflower adaptation. *Molecular Ecology* 20:3503–3512.
- 550 Bradshaw, H. and D. W. Schemske, 2003. Allele substitution at a flower colour locus  
551 produces a pollinator shift in monkeyflowers. *Nature* 426:176–178.
- 552 Bradshaw, W. and C. Holzapfel, 2008. Genetic response to rapid climate change: it’s  
553 seasonal timing that matters. *Molecular ecology* 17:157–166.
- 554 Bradshaw, W. E. and C. M. Holzapfel, 2001. Genetic shift in photoperiodic response corre-  
555 lated with global warming. *Proceedings of the National Academy of Sciences* 98:14509–  
556 14511.
- 557 Brown, J. S. and D. L. Venable, 1986. Evolutionary ecology of seed-bank annuals in  
558 temporally varying environments. *The American Naturalist* 127:31–47.

- 559 Chevruud, J., 2001. A simple correction for multiple comparisons in interval mapping genome  
560 scans. *Heredity* 87:52–58.
- 561 Clausen, J., D. Keck, and W. Hiesey, 1940. Experimental studies on the nature of species.  
562 I. The effects of varied environments on western American plants, vol. 520. Carnegie  
563 Institution of Washington, Washington, D.C.
- 564 Cleveland, W. S., E. Grosse, and W. M. Shyu, 1992. Local regression models. *Statistical*  
565 *models in S* Pp. 309–376.
- 566 Coyne, J. A. and E. Beecham, 1987. Heritability of two morphological characters within  
567 and among natural populations of *Drosophila melanogaster*. *Genetics* 117:727–737. URL  
568 <http://www.genetics.org/content/117/4/727>.
- 569 Endler, J., 1977. Geographic variation, clines, and speciation. Princeton University Press,  
570 Princeton, NJ.
- 571 Flood, P. J., J. Harbinson, and M. G. M. Aarts, 2011. Natural genetic variation in plant  
572 photosynthesis. *Trends in Plant Science* 16:327–335.
- 573 Fox, J. and S. Weisberg, 2011. *An R Companion to Applied Regression*. Second ed. Sage,  
574 Thousand Oaks CA.
- 575 Friedman, J. and M. J. Rubin, 2015. All in good time: Understanding annual and perennial  
576 strategies in plants. *American Journal of Botany* 102:497–499.
- 577 Friedman, J., A. D. Twyford, J. H. Willis, and B. K. Blackman, 2015. The extent and  
578 genetic basis of phenotypic divergence in life history traits in *Mimulus guttatus*. *Molecular*  
579 *Ecology* 24:111–122.
- 580 Genuer, R., J.-M. Poggi, and C. Tuleau-Malot, 2015. VSURF: An R package for variable  
581 selection using random forests. *The R Journal* 7:19–33.
- 582 ———, 2016. VSURF: Variable Selection Using Random Forests. URL <http://CRAN.R->

- 583 [project.org/package=VSURF](http://CRAN.R-project.org/package=VSURF). R package version 1.0.3.
- 584 Gilbert, P., 2014. Brief User's Guide: Dynamic Systems Estimation. URL [http://cran.r-](http://cran.r-project.org/web/packages/dse/vignettes/dse-guide.pdf)  
585 [project.org/web/packages/dse/vignettes/dse-guide.pdf](http://cran.r-project.org/web/packages/dse/vignettes/dse-guide.pdf).
- 586 Givnish, T. J., 1988. Adaptation to sun and shade: a whole-plant perspective. *Functional*  
587 *Plant Biology* 15:63–92.
- 588 Hadfield, J. D., 2010. Mcmc methods for multi-response generalized linear mixed mod-  
589 els: The MCMCglmm R package. *Journal of Statistical Software* 33:1–22. URL  
590 <http://www.jstatsoft.org/v33/i02/>.
- 591 ———, 2016. The spatial scale of local adaptation in a stochastic environment. *Ecology*  
592 *Letters* 19:780–788.
- 593 Hereford, J., 2009. A quantitative survey of local adaptation and fitness trade-offs. *The*  
594 *American Naturalist* 173:579–588.
- 595 Hereford, J. and A. A. Winn, 2008. Limits to local adaptation in six populations of the  
596 annual plant *Diodia teres*. *New Phytologist* 178:888–896.
- 597 Hiesey, W., M. Nobs, and O. Björkman, 1971. Experimental studies on the nature of  
598 species. V. Biosystematics, genetics, and physiological ecology of the Erythranthe section  
599 of *Mimulus*, vol. 628. Carnegie Institution of Washington, Washington, D.C.
- 600 Hiesey, W. M., J. Clausen, and D. D. Keck, 1942. Relations between climate and intraspe-  
601 cific variation in plants. *American Naturalist* Pp. 5–22.
- 602 Hijmans, R. J., S. Phillips, J. Leathwick, and J. Elith, 2016. *dismo*: Species distribution  
603 modeling. URL <http://CRAN.R-project.org/package=dismo>. R package version 1.1-1.
- 604 Hoffmann, A. A., A. Anderson, and R. Hallas, 2002. Opposing clines for high and low  
605 temperature resistance in *Drosophila melanogaster*. *Ecology Letters* 5:614–618.
- 606 Hopkins, R., J. Schmitt, and J. R. Stinchcombe, 2008. A latitudinal cline and response to

- 607 vernalization in leaf angle and morphology in *Arabidopsis thaliana* (Brassicaceae). *New*  
608 *Phytologist* 179:155–164.
- 609 Huey, R. B., G. W. Gilchrist, M. L. Carlson, D. Berrigan, and L. Serra, 2000. Rapid  
610 evolution of a geographic cline in size in an introduced fly. *Science* 287:308–309.
- 611 Huxley, J. S., 1938. Clines: an auxiliary taxonomic principle. *Nature* 142:219–220.
- 612 Iwasa, Y. and D. Cohen, 1989. Optimal growth schedule of a perennial plant. *American*  
613 *Naturalist* 133:480–505.
- 614 Kawecki, T. J. and D. Ebert, 2004. Conceptual issues in local adaptation. *Ecology Letters*  
615 7:1225–1241.
- 616 Kooyers, N. J., 2015. The evolution of drought escape and avoidance in natural herbaceous  
617 populations. *Plant Science* 234:155–162.
- 618 Kooyers, N. J., A. B. Greenlee, J. M. Colicchio, M. Oh, and B. K. Blackman, 2015. Repli-  
619 cate altitudinal clines reveal that evolutionary flexibility underlies adaptation to drought  
620 stress in annual *Mimulus guttatus*. *New Phytologist* 206:152–165.
- 621 Kooyers, N. J. and K. M. Olsen, 2012. Rapid evolution of an adaptive cyanogenesis cline  
622 in introduced north american white clover (*Trifolium repens* L.). *Molecular Ecology*  
623 21:2455–2468.
- 624 Kuznetsova, A., P. Bruun Brockhoff, and R. Haubo Bojesen Christensen, 2016.  
625 lmerTest: Tests in Linear Mixed Effects Models. URL [http://CRAN.R-](http://CRAN.R-project.org/package=lmerTest)  
626 [project.org/package=lmerTest](http://CRAN.R-project.org/package=lmerTest). R package version 2.0-32.
- 627 Lehner, B., K. Verdin, and A. Jarvis, 2006. HydroSHEDS technical documentation. World  
628 Wildlife Fund, Washington, D.C. URL [www.worldwildlife.org/hydrosheds](http://www.worldwildlife.org/hydrosheds).
- 629 Leimu, R. and M. Fischer, 2008. A meta-analysis of local adaptation in plants. *PLoS One*  
630 3:e4010–e4010.

- 631 Lenormand, T., 2002. Gene flow and the limits to natural selection. *Trends in Ecology &*  
632 *Evolution* 17:183–189.
- 633 Levins, R., 1968. *Evolution in changing environments: some theoretical explorations.*  
634 Princeton University Press, Princeton, New Jersey.
- 635 Liaw, A. and M. Wiener, 2002. Classification and regression by randomforest. *R News*  
636 2:18–22. URL <http://CRAN.R-project.org/doc/Rnews/>.
- 637 Lowry, D. B. and J. H. Willis, 2010. A widespread chromosomal inversion polymorphism  
638 contributes to a major life-history transition, local adaptation, and reproductive isola-  
639 tion. *PLoS biology* 8:2227.
- 640 Ludlow, M. M., 1989. Strategies of response to water stress. Pp. 269–281, *in* K. H. Kreeb,  
641 H. Richter, and T. M. Hinckley, eds. *Structural and functional responses to environmental*  
642 *stresses.* SPB Academic, The Hague, The Netherlands.
- 643 Nesom, G. L., 2014. Taxonomy of *Erythranthe* sect. *Erythranthe* (phrymaceae). *Phytoneu-*  
644 *ron* 31:1–41.
- 645 Oakeshott, J., J. Gibson, P. Anderson, W. Knibb, D. Anderson, and G. Chambers, 1982.  
646 Alcohol dehydrogenase and glycerol-3-phosphate dehydrogenase clines in *Drosophila*  
647 *melanogaster* on different continents. *Evolution* Pp. 86–96.
- 648 Paul, J. R., T. L. Parchman, B. Econopouly, C. A. Buerkle, and A. L. Angert, In review.  
649 Population genomics and range limits: diversity and differentiation across the geographic  
650 range of *Mimulus cardinalis* (Phrymaceae) .
- 651 Paul, J. R., S. N. Sheth, and A. L. Angert, 2011. Quantifying the impact of gene flow  
652 on phenotype-environment mismatch: A demonstration with the scarlet monkeyflower  
653 *Mimulus cardinalis*. *The American Naturalist* 178:S62–S79.
- 654 Pfaff, B., 2008. VAR, SVAR and SVEC models: Implementation within R package vars.  
655 *Journal of Statistical Software* 27:1–32.

- 656 Ronce, O. and M. Kirkpatrick, 2001. When sources become sinks: migrational meltdown  
657 in heterogeneous habitats. *Evolution* 55:1520–1531.
- 658 Salguero-Gómez, R., O. R. Jones, E. Jongejans, S. P. Blomberg, D. J. Hodgson, C. Mbeau-  
659 Ache, P. A. Zuidema, H. de Kroon, and Y. M. Buckley, 2016. Fast–slow continuum and  
660 reproductive strategies structure plant life-history variation worldwide. *Proceedings of*  
661 *the National Academy of Sciences of the United States of America* 113:230–235.
- 662 Sawada, S., Y. Nakajima, M. Tsukuda, K. Sasaki, Y. Hazama, M. Futatsuya, and  
663 A. Watanabe, 1994. Ecotypic differentiation of dry matter production processes in re-  
664 lation to survivorship and reproductive potential in *Plantago asiatica* populations along  
665 climatic gradients. *Functional Ecology* 8:400–409.
- 666 Schemske, D. W., G. G. Mittelbach, H. V. Cornell, J. M. Sobel, and K. Roy, 2009. Is  
667 there a latitudinal gradient in the importance of biotic interactions? *Annual Review of*  
668 *Ecology, Evolution, and Systematics* 40:245–269.
- 669 Schluter, D., 2000. *The Ecology of Adaptive Radiation*. Oxford University Press.
- 670 Schmidt, P. S., L. Matzkin, M. Ippolito, and W. F. Eanes, 2005. Geographic variation in di-  
671 apause incidence, life-history traits, and climatic adaptation in *Drosophila melanogaster*.  
672 *Evolution* 59:1721–1732.
- 673 Sheth, S. N. and A. L. Angert, 2017. Demographic compensation does not rescue *Mimulus*  
674 *cardinalis* populations at the southern edge of the species range. bioRxiv .
- 675 Slatkin, M., 1978. Spatial patterns in the distributions of polygenic characters. *Journal of*  
676 *Theoretical Biology* 70:213–28.
- 677 Stearns, S., 1976. Life history tactics: a review of the ideas. *Quarterly Review of Biology*  
678 51.
- 679 Stinchcombe, J. R., C. Weinig, M. Ungerer, K. M. Olsen, C. Mays, S. S. Halldorsdottir,  
680 M. D. Purugganan, and J. Schmitt, 2004. A latitudinal cline in flowering time in *Ara-*

- 681 *bidopsis thaliana* modulated by the flowering time gene FRIGIDA. Proceedings of the  
682 National Academy of Sciences of the United States of America 101:4712–4717.
- 683 Stock, A. J., B. E. Campitelli, and J. R. Stinchcombe, 2014. Quantitative genetic variance  
684 and multivariate clines in the ivyleaf morning glory, *Ipomoea hederacea*. Philosophical  
685 Transactions of the Royal Society B: Biological Sciences 369:20130259.
- 686 Templeton, A. R. and D. A. Levin, 1979. Evolutionary consequences of seed pools. The  
687 American Naturalist 114:232–249.
- 688 Therneau, T. M., 2015. survival: A Package for Survival Analysis in S. URL  
689 <http://CRAN.R-project.org/package=survival>. R package version 2.38.
- 690 Turesson, G., 1922. The genotypic response of the plant species to habitat. Hereditas  
691 3:211–350.
- 692 Umina, P., A. Weeks, M. Kearney, S. McKechnie, and A. Hoffmann, 2005. A rapid shift  
693 in a classic clinal pattern in drosophila reflecting climate change. Science 308:691–693.
- 694 United States Geological Survey, 2015. National Hydrogeography Dataset. United States  
695 Geological Survey, Washington, D.C. URL <http://nhd.usgs.gov/index.html>.
- 696 Wang, T., A. Hamann, D. L. Spittlehouse, and T. Q. Murdock, 2012. ClimateWNA –  
697 high-resolution spatial climate data for western North America. Journal of Applied  
698 Meteorology and Climatology 51:16–29.
- 699 Wright, K. M., D. Lloyd, D. B. Lowry, M. R. Macnair, and J. H. Willis, 2013. Indirect  
700 evolution of hybrid lethality due to linkage with selected locus in *Mimulus guttatus*. PLoS  
701 Biol 11:e1001497.
- 702 Wu, C., D. Lowry, A. Cooley, K. Wright, Y. Lee, and J. Willis, 2008. *Mimulus* is an  
703 emerging model system for the integration of ecological and genomic studies. Heredity  
704 100:220–230.



705 Wu, C. A., D. B. Lowry, L. I. Nutter, and J. H. Willis, 2010. Natural variation for drought-  
706 response traits in the *Mimulus guttatus* species complex. *Oecologia* 162:23–33.

707 Yeaman, S. and A. Jarvis, 2006. Regional heterogeneity and gene flow maintain variance  
708 in a quantitative trait within populations of lodgepole pine. *Proceedings of the Royal*  
709 *Society of London B* 273:1587–1593.

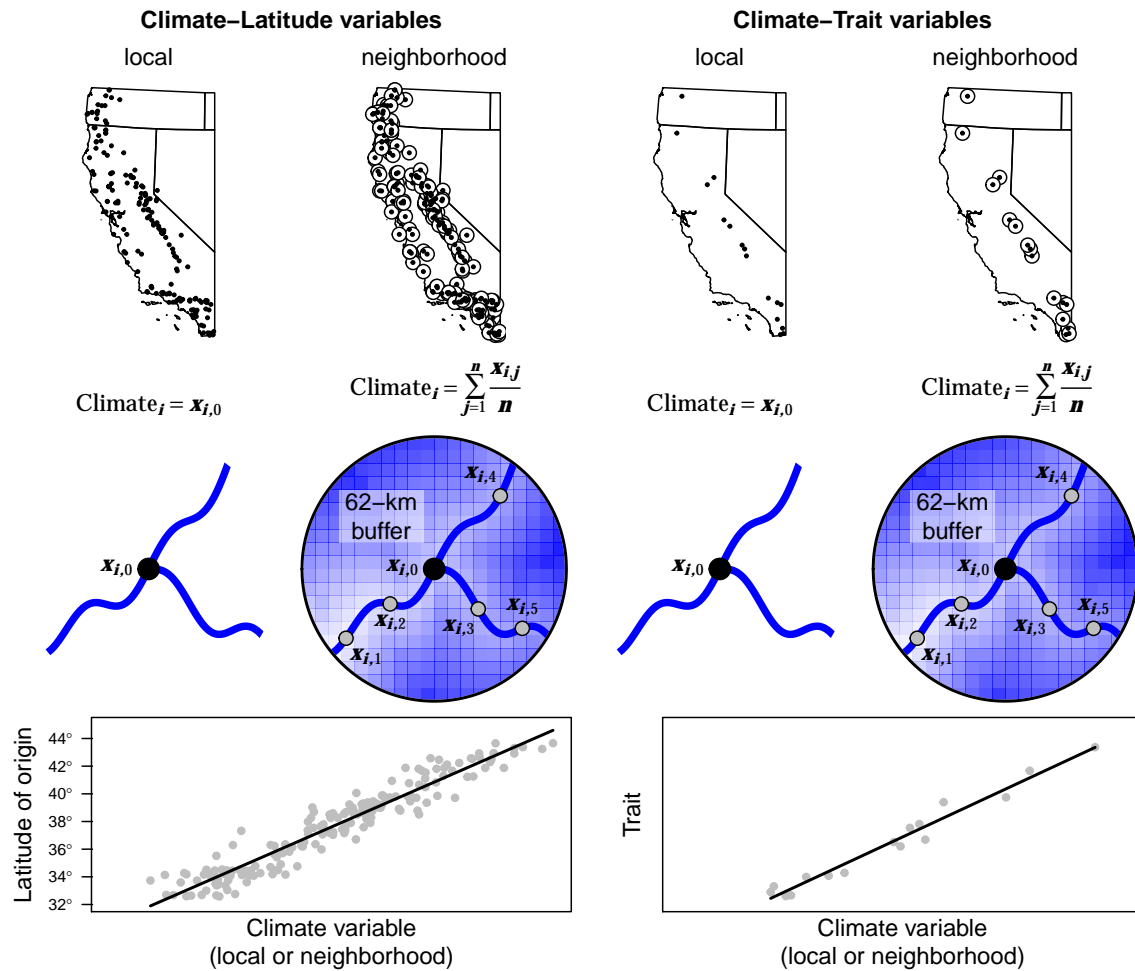

**Figure 2:** Overview of method for identifying putative climatic selective agents underlying latitudinal cline. We looked for climate variables that explained both the latitude of 356 *E. cardinalis* occurrences ('Climate-Latitude variables') and traits ('Climate-Trait variables'). For Climate-Latitude variables we extracted climate data from recent occurrences located throughout California and Oregon, USA (shown in map). For Climate-Trait variables, we extracted climatic data for the 16 focal populations. For both analyses, we extracted local and neighborhood climate. Local climate refers to climate only from where a population was collected ( $x_{i,0}$ ). Neighborhood climate was calculated as the average over 1000 points in a 62-km radius climatic neighborhood ( $x_{i,1}, x_{i,2}, \dots$ ), but only along stream habitats as *E. cardinalis* is riparian. We identified climatic factors that most strongly predicted latitude of occurrences (Climate-Latitude variables) and traits (Climate-Trait variables), as shown for hypothetical data in plots at the bottom of the figure.

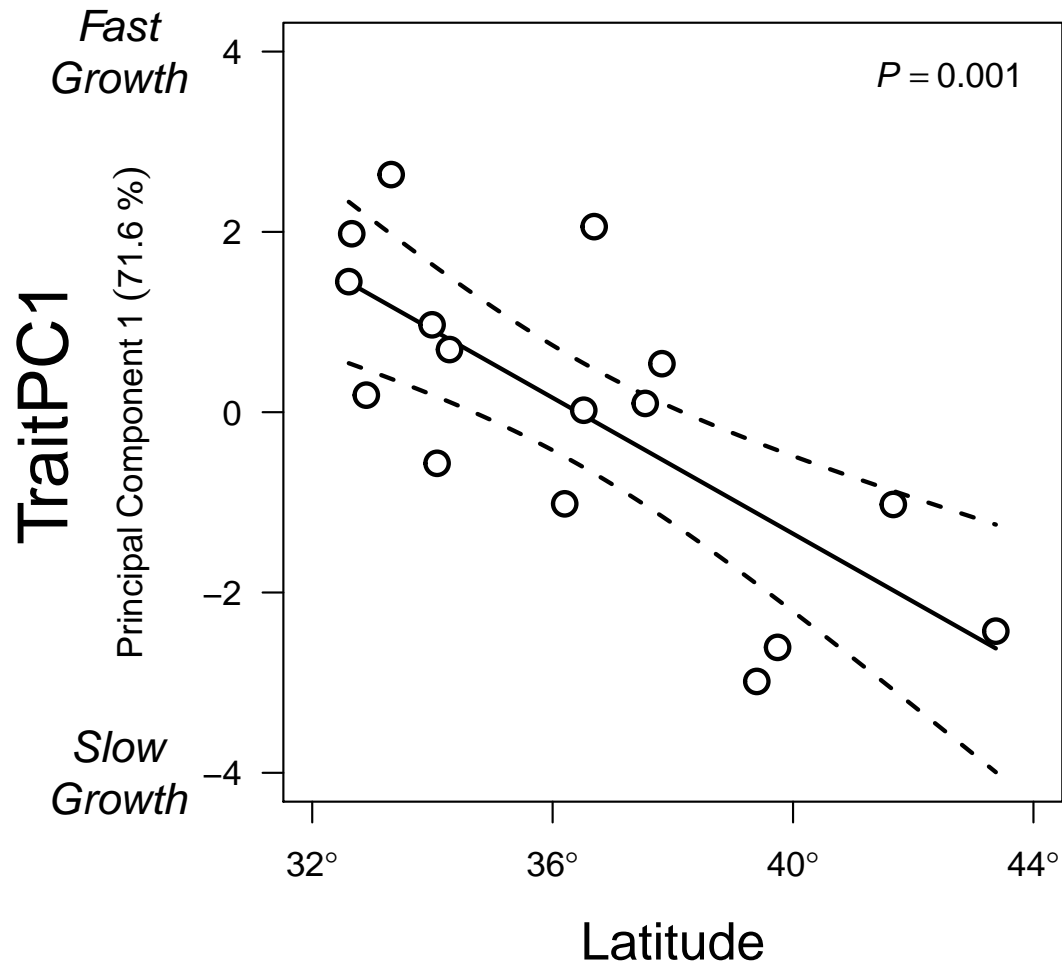

**Figure 3:** Trait variation, from fast to slow growth, is closely associated with latitude. Each point is a population's latitude of origin (x-axis) and position along the slow to fast growth axis (y-axis), defined as Principal Component 1 of four traits (see Material and Methods). The line and 95% confidence intervals were estimated using linear regression.

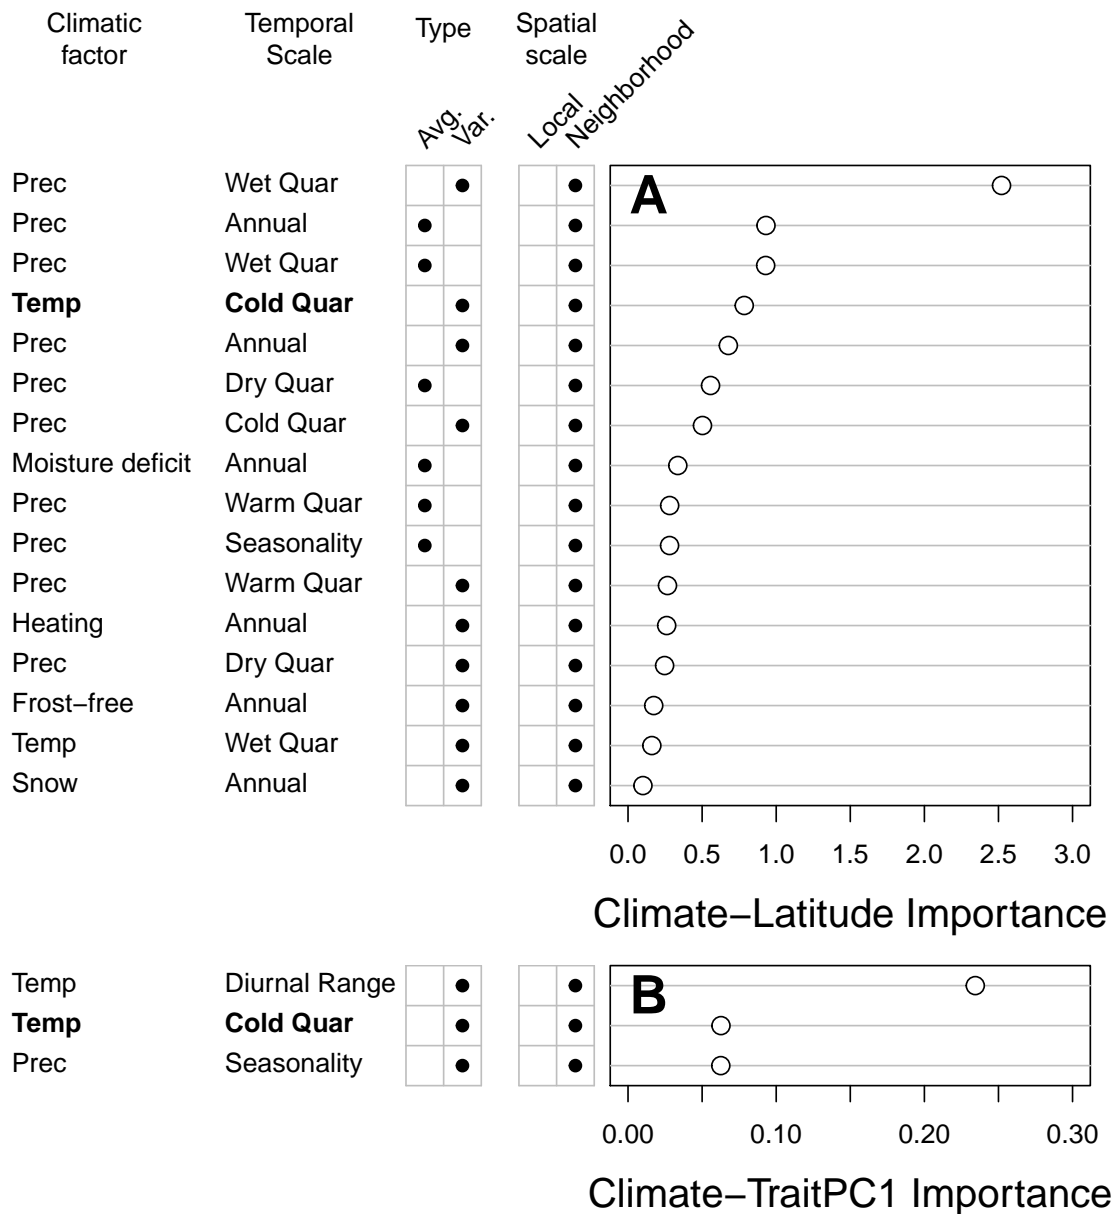

**Figure 4:** Climatic variation integrated over climatic neighborhood is closely correlated with latitude of *E. cardinalis* and trait variation. A. Using Random Forest regression, we identified 16 climatic variables significantly (high importance) associated with latitude of *E. cardinalis* occurrences. B. Only one of the most important Climate-Latitude variables (in bold) was among the most important Climate-TraitPC1 variables. Variable importance is defined as the average amount a climate variable reduces mean-squared error in the predicted response (TraitPC1 or Latitude), compared to a randomly permuted dataset, across all trees in the random forest (see Genuer et al. [2015] for further detail). Note that the Importance values in A and B are not comparable because the dependent variables (Latitude and Trait PC1, respectively) are on different scales. Climatic variables (left of A; right of B) are defined by four qualities: Climatic factor – Temperature (Temp), Precipitation (Prec), Heating degree-days (Heating), Snow (precipitation as snow); Temporal scale – Annual, Coldest quarter (Cold Quar), Warmest Quarter (Warm Quar), Wettest quarter (Wet Quar), Driest Quarter (Dry Quar), or Seasonality; Type – 30-year average (Avg.) or coefficient of variation (Var.); Spatial scale – local or 62-km radius climatic neighborhood.

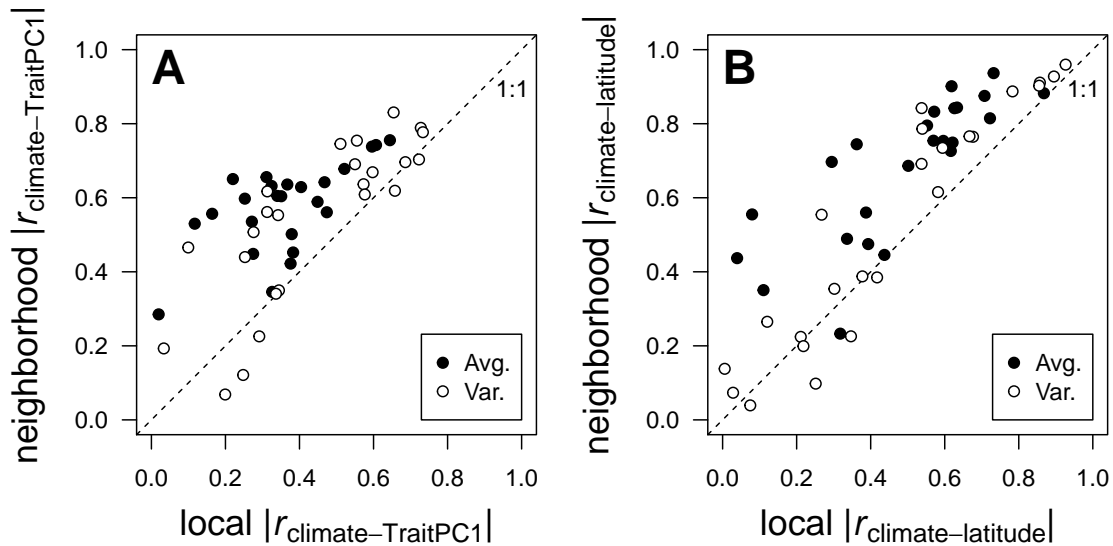

**Figure 5:** Neighborhood climate predicts TraitPC1 ('Climate-trait', panel A) and Latitude of occurrences ('Climate-latitude', panel B) better than local climate. Each point is the absolute value of the Pearson correlation coefficient ( $|r|$ ) between TraitPC1 (A) or latitude (B) for 24 climatic factors, for which we used both the 30-year mean (closed circles) and coefficient of variation (open circles). Most points lie above the 1:1 line, indicating stronger correlations with neighborhood compared to local climate. Neighborhood climate was integrated over a 62-km radius around focal populations (see text for further detail).

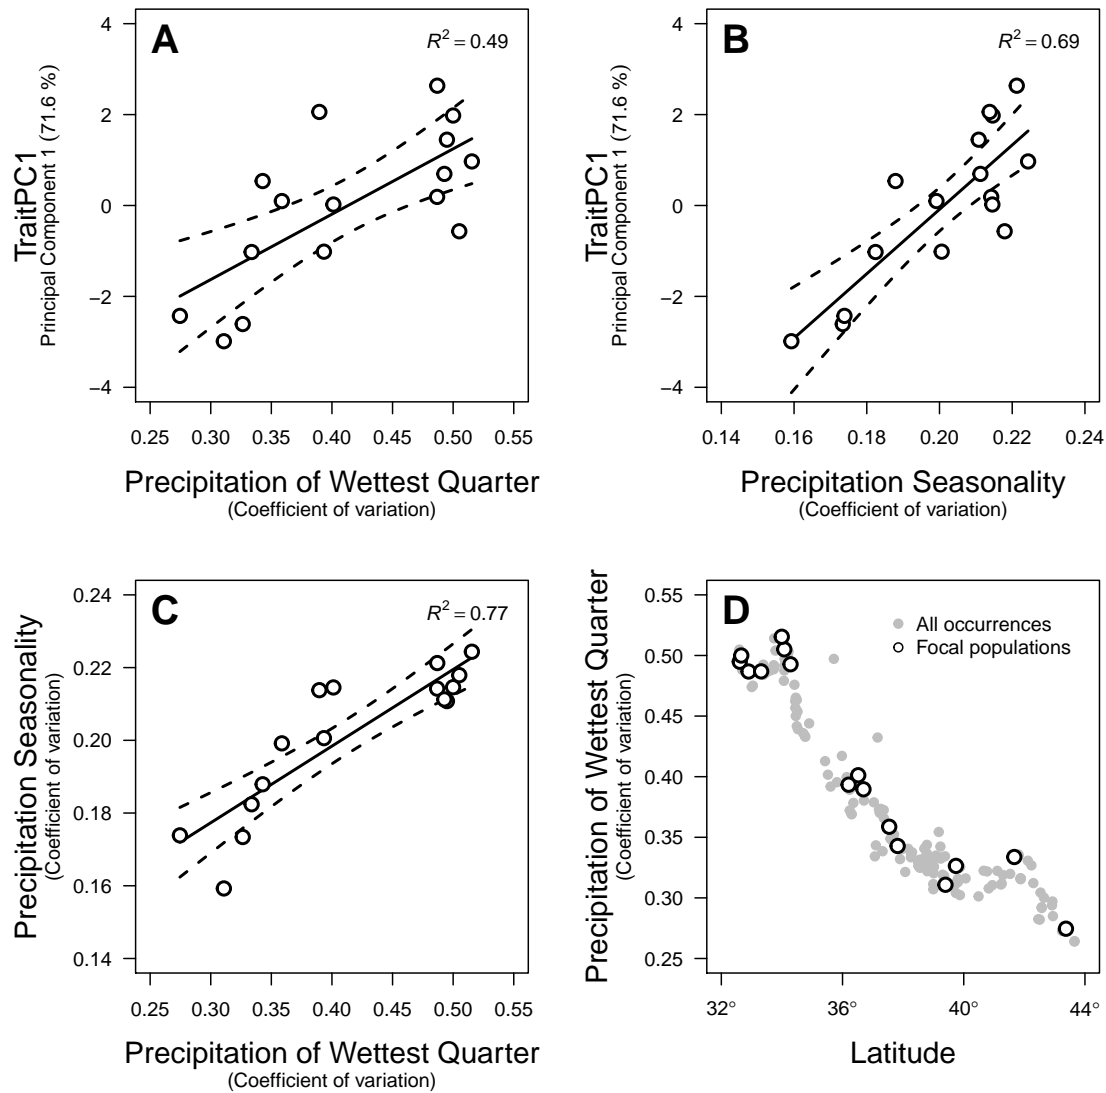

**Figure 6:** Variation in precipitation is correlated with TraitPC1 and latitude. A. Greater values of TraitPC1 are associated with greater interannual variation in precipitation of the wettest quarter. This was the most important Climate-Latitude variable, but not among the most important Climate-TraitPC1 variables. B. However, a closely related parameter, interannual variation in precipitation seasonality, was among the most important Climate-TraitPC1 variables. C. Across focal populations, variation in precipitation of the wettest quarter and seasonality are closely correlated. D. Southern populations of *E. cardinalis* experience much greater interannual variation in precipitation. In all panels, we report climatic neighborhood values (see Material and Methods). Regression lines, 95% confidence intervals, and coefficients of determination ( $R^2$ ) were calculated using linear regression.

710 **Supporting Information**

711 **Supporting Tables**

**Table S1:** Initial size of seedlings did not vary among Populations, Families, or Treatments. We used a censored Gaussian model of initial size at the outset of the experiment (longest leaf length of the first true leaves). The model was censored because we could not accurately measure leaves less than 0.25 mm with digital callipers (217 of 702, 30.9%, were too small). We fit models using a Bayesian MCMC method implemented using the MCMCglmm function with default priors in the R package **MCMCglmm** version 2.17 (Hadfield, 2010). We estimated the posterior distribution from 1000 samples of an MCMC chain run for  $10^5$  steps after a  $10^4$  step burn-in. We used step-wise backward elimination procedure to find the best-supported model according to Deviance Information Criterion (DIC).

| Model                                                                                                                                       | Random | DIC    |
|---------------------------------------------------------------------------------------------------------------------------------------------|--------|--------|
| Population + Water + Temperature +<br>Population:Water +<br>Population:Temperature +<br>Water:Temperature +<br>Population:Water:Temperature | Family | 1638   |
| Population + Water + Temperature +<br>Population:Water +<br>Population:Temperature +<br>Water:Temperature                                   | Family | 1605.2 |
| Population + Water + Temperature +<br>Population:Water +<br>Population:Temperature                                                          | Family | 1603.4 |
| Population + Water + Temperature +<br>Population:Water +<br>Water:Temperature                                                               | Family | 1577.5 |
| Population + Water + Temperature +<br>Population:Temperature +<br>Water:Temperature                                                         | Family | 1579.9 |
| Population + Water + Temperature +<br>Population:Water                                                                                      | Family | 1577.3 |
| Population + Water + Temperature +<br>Water:Temperature                                                                                     | Family | 1550.5 |
| Population + Water + Temperature                                                                                                            | Family | 1549.3 |
| Population + Water                                                                                                                          | Family | 1541.7 |
| Population + Temperature                                                                                                                    | Family | 1546.8 |
| Water + Temperature                                                                                                                         | Family | 1551.1 |
| Population                                                                                                                                  | Family | 1541.9 |
| Water                                                                                                                                       | Family | 1543.9 |
| -                                                                                                                                           | Family | 1541.7 |
| -                                                                                                                                           | -      | 1538.3 |



**Table S2:** Climatic variables used

| Abbreviation | Climate variable                                                               |
|--------------|--------------------------------------------------------------------------------|
| DD_0         | degree-days below 0°C(chilling degree-days)                                    |
| DD5          | degree-days above 5°C(growing degree-days)                                     |
| DD_18        | degree-days below 18°C(heating degree-days)                                    |
| DD18         | degree-days above 18°C(cooling degree-days)                                    |
| NFFD         | number of frost-free days                                                      |
| PAS          | precipitation as snow (mm) between August in previous year and July in current |
| Eref         | Hargreaves reference evaporation (mm)                                          |
| CMD          | Hargreaves climatic moisture deficit (mm)                                      |
| RH           | mean annual relative humidity                                                  |
| bio1         | annual mean temperature                                                        |
| bio2         | mean diurnal range (mean of monthly (max temp - min temp))                     |
| bio3         | isothermality (bio2/bio7) (* 100)                                              |
| bio4         | temperature seasonality (standard deviation *100)                              |
| bio5         | max temperature of warmest month                                               |
| bio6         | min temperature of coldest month                                               |
| bio7         | temperature annual range (bio5-bio6)                                           |
| bio8         | mean temperature of wettest quarter                                            |
| bio9         | mean temperature of driest quarter                                             |
| bio10        | mean temperature of warmest quarter                                            |
| bio11        | mean temperature of coldest quarter                                            |
| bio12        | annual precipitation                                                           |
| bio15        | precipitation seasonality (coefficient of variation)                           |
| bio16        | precipitation of wettest quarter                                               |
| bio17        | precipitation of driest quarter                                                |
| bio18        | precipitation of warmest quarter                                               |
| bio19        | precipitation of coldest quarter                                               |

**Table S3:** Analysis of variance (ANOVA) table on leaf expansion rate (LER) using **ImerTest** (Kuznetsova et al., 2016). Family and Block were included as random effects. Abbreviations: SS = sum of squares; MS = mean sum of squares (SS / df1); df1 = numerator degrees of freedom; df2 = denominator degrees of freedom.

|                                  | SS    | MS    | df1 | df2 | <i>F-value</i> | <i>P-value</i>       |
|----------------------------------|-------|-------|-----|-----|----------------|----------------------|
| Day to Germination               | 12.12 | 12.12 | 1   | 637 | 35.21          | $4.9 \times 10^{-9}$ |
| Population                       | 22.22 | 1.48  | 15  | 118 | 4.3            | $2.5 \times 10^{-6}$ |
| Temperature                      | 80.42 | 80.42 | 1   | 5   | 233.61         | $2.6 \times 10^{-5}$ |
| Water                            | 4.1   | 4.1   | 1   | 5   | 11.92          | 0.019                |
| Temperature × Water              | 0.03  | 0.03  | 1   | 4   | 0.07           | 0.801                |
| Population × Temperature         | 2.76  | 0.18  | 15  | 547 | 0.53           | 0.925                |
| Population × Water               | 9.66  | 0.64  | 15  | 562 | 1.87           | 0.024                |
| Population × Temperature × Water | 4.11  | 0.27  | 15  | 530 | 0.78           | 0.700                |

**Table S4:** Analysis of variance (ANOVA) table on stem elongation rate (SER) using **ImerTest** (Kuznetsova et al., 2016). Family and Block were included as random effects. Abbreviations: SS = sum of squares; MS = mean sum of squares (SS / df1); df1 = numerator degrees of freedom; df2 = denominator degrees of freedom.

|                                  | SS   | MS   | df1 | df2 | <i>F-value</i> | <i>P-value</i>       |
|----------------------------------|------|------|-----|-----|----------------|----------------------|
| Day to Germination               | 3.6  | 3.6  | 1   | 662 | 21.1           | $5.1 \times 10^{-6}$ |
| Population                       | 12   | 0.8  | 15  | 113 | 4.7            | $5.8 \times 10^{-7}$ |
| Temperature                      | 12.4 | 12.4 | 1   | 6   | 72.8           | $1.5 \times 10^{-4}$ |
| Water                            | 0.6  | 0.6  | 1   | 5   | 3.7            | 0.113                |
| Temperature × Water              | 0.9  | 0.9  | 1   | 4   | 5.2            | 0.093                |
| Population × Temperature         | 3.6  | 0.2  | 15  | 549 | 1.4            | 0.126                |
| Population × Water               | 2.8  | 0.2  | 15  | 536 | 1.1            | 0.330                |
| Population × Temperature × Water | 1.5  | 0.1  | 15  | 518 | 0.6            | 0.874                |

**Table S5:** Analysis of variance (ANOVA) table on photosynthetic rate using **lmerTest** (Kuznetsova et al., 2016). Family and Block were included as random effects. Abbreviations: SS = sum of squares; MS = mean sum of squares (SS / df1); df1 = numerator degrees of freedom; df2 = denominator degrees of freedom.

|                                  | SS    | MS    | df1 | df2 | <i>F-value</i> | <i>P-value</i>       |
|----------------------------------|-------|-------|-----|-----|----------------|----------------------|
| Population                       | 347.7 | 23.2  | 15  | 78  | 3.02           | $7.5 \times 10^{-4}$ |
| Temperature                      | 134.1 | 134.1 | 1   | 6   | 17.46          | $6.4 \times 10^{-3}$ |
| Water                            | 51    | 51    | 1   | 4   | 6.64           | 0.066                |
| Temperature × Water              | 0.7   | 0.7   | 1   | 3   | 0.09           | 0.781                |
| Population × Temperature         | 218.6 | 14.6  | 15  | 263 | 1.9            | 0.024                |
| Population × Water               | 87.7  | 5.8   | 15  | 233 | 0.76           | 0.724                |
| Population × Temperature × Water | 91.4  | 6.1   | 15  | 208 | 0.79           | 0.686                |

**Table S6:** Analysis of deviance table on the probability of mortality by the end of the experiment using Type-II Wald  $\chi^2$  tests in the R package **car** (Fox and Weisberg, 2011). Family and Block were included as random effects. Abbreviations: df = degrees of freedom

|                                  | $\chi^2$ | df | <i>P-value</i>        |
|----------------------------------|----------|----|-----------------------|
| Population                       | 32       | 31 | 0.419                 |
| Temperature                      | 31.8     | 6  | $1.8 \times 10^{-5}$  |
| Water                            | 69.2     | 12 | $4.6 \times 10^{-10}$ |
| Temperature × Water              | 20.7     | 1  | $5.3 \times 10^{-6}$  |
| Population × Temperature         | 5.6      | 15 | 0.985                 |
| Population × Water               | 8.6      | 15 | 0.897                 |
| Population × Temperature × Water | 0.2      | 15 | 1.000                 |

**Table S7:** Important climatic variables predicting latitude of *E. cardinalis* populations ('Climate-Latitude') and the first principal component of traits measured in a common garden ('Climate-TraitPC1'). Local climatic variables were measured from the exact location of collection; neighborhood climatic variables were averaged from a 62-km neighborhood around population (see Material and Methods). Importance and significance were determined using the variable selection using random forests (VSURF) algorithm (see Material and Methods). Climatic variables are described in Table S2.  $\mu$  signifies the mean of the climate variables from 1981–2010;  $\sigma$  indicates coefficient of variation among years.

| Climate-Latitude variables                                     | Climate-TraitPC1 variables                                     |
|----------------------------------------------------------------|----------------------------------------------------------------|
| Precipitation of wettest quarter ( $\sigma$ , neighborhood)    | Mean diurnal range ( $\sigma$ , neighborhood)                  |
| Annual precipitation ( $\mu$ , neighborhood)                   | Mean temperature of coldest quarter ( $\sigma$ , neighborhood) |
| Precipitation of wettest quarter ( $\mu$ , neighborhood)       | Precipitation seasonality ( $\sigma$ , neighborhood)           |
| Mean temperature of coldest quarter ( $\sigma$ , neighborhood) |                                                                |
| Annual precipitation ( $\sigma$ , neighborhood)                |                                                                |
| Precipitation of driest quarter ( $\mu$ , neighborhood)        |                                                                |
| Precipitation of coldest quarter ( $\sigma$ , neighborhood)    |                                                                |
| Hargreaves climatic moisture deficit ( $\mu$ , neighborhood)   |                                                                |
| Precipitation of warmest quarter ( $\mu$ , neighborhood)       |                                                                |
| Precipitation seasonality ( $\mu$ , neighborhood)              |                                                                |
| Precipitation of warmest quarter ( $\sigma$ , neighborhood)    |                                                                |
| Heating degree-days ( $\sigma$ , neighborhood)                 |                                                                |
| Precipitation of driest quarter ( $\sigma$ , neighborhood)     |                                                                |
| Number of frost-free days ( $\sigma$ , neighborhood)           |                                                                |
| Mean temperature of wettest quarter ( $\sigma$ , neighborhood) |                                                                |
| Precipitation as snow ( $\sigma$ , neighborhood)               |                                                                |

712 Supporting Figures

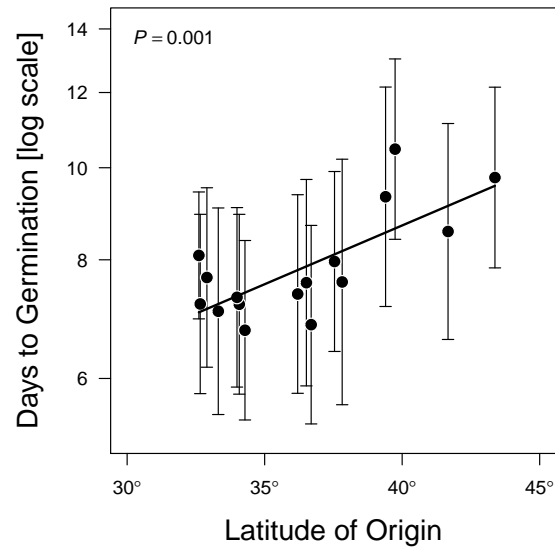

**Figure S1:** Southern populations germinate faster. Each point is a population of *E. cardinalis* showing its latitude of origin (x-axis) and model-predicted days to germination in days under growth chamber conditions (see Material and Methods). Bars around each point are 95% confidence intervals. Predicted time to germination and confidence intervals are based on survival regression (see Materials and Materials). The line is the linear regression of  $\log(\text{model-predicted days to germination}) \sim \text{latitude}$ . The  $P$ -value of the regression is given in the upper left corner.

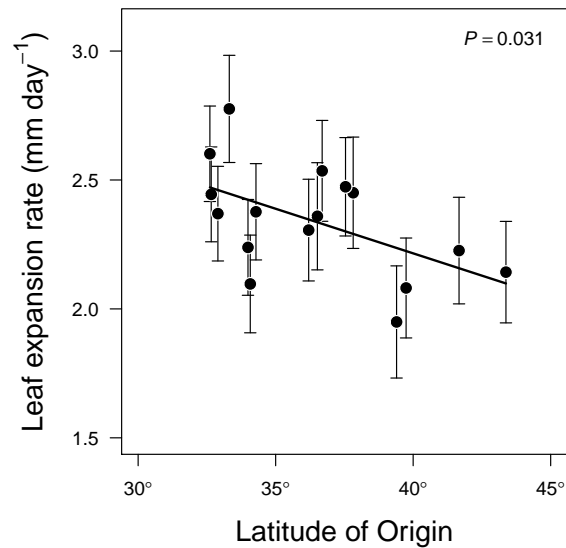

**Figure S2:** Southern populations grow faster. Each point is a population of *E. cardinalis* showing its latitude of origin (x-axis) and model-predicted leaf expansion rate during the rosette phase. Bars around each point are 95% confidence intervals. Predicted leaf expansion rate based least-square mean estimates and confidence intervals were calculated from linear mixed-effects models (see Materials and Materials). The line is the linear regression of model-predicted leaf expansion rate  $\sim$  latitude. The  $P$ -value of the regression is given in the upper right corner.

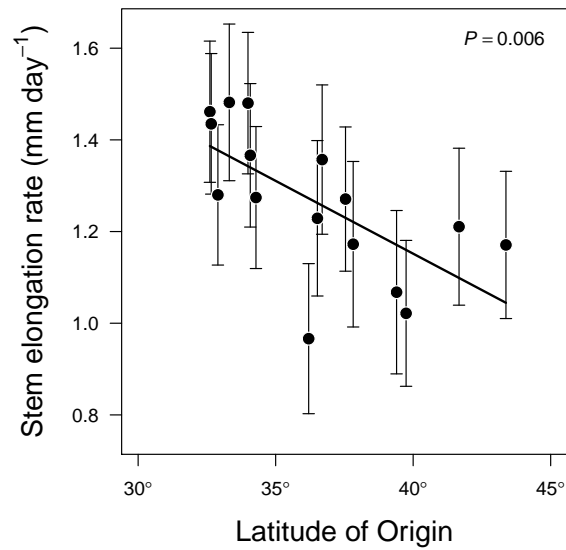

**Figure S3:** Southern populations grow faster. Each point is a population of *E. cardinalis* showing its latitude of origin (x-axis) and model-predicted stem elongation rate. Bars around each point are 95% confidence intervals. Predicted stem elongation rate based least-square mean estimates and confidence intervals were calculated from linear mixed-effects models (see Materials and Materials). The line is the linear regression of model-predicted stem elongation rate  $\sim$  latitude. The  $P$ -value of the regression is given in the upper right corner.

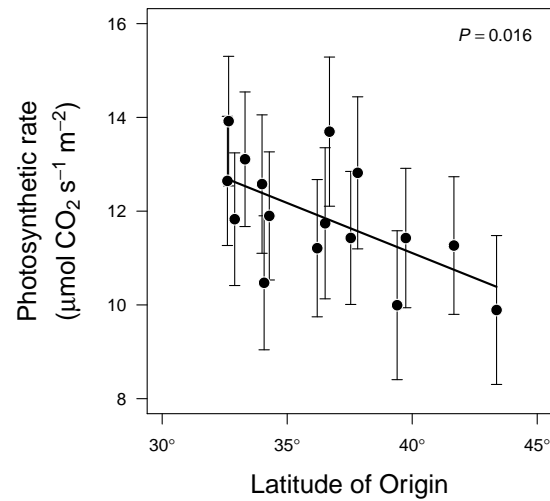

**Figure S4:** Southern populations photosynthesize faster. Each point is a population of *E. cardinalis* showing its latitude of origin (x-axis) and model-predicted instantaneous photosynthetic rate. Bars around each point are 95% confidence intervals. Predicted photosynthetic rates based least-square mean estimates and confidence intervals were calculated from linear mixed-effects models (see Materials and Materials). The line is the linear regression of model-predicted photosynthetic rate  $\sim$  latitude. The  $P$ -value of the regression is given in the upper right corner.



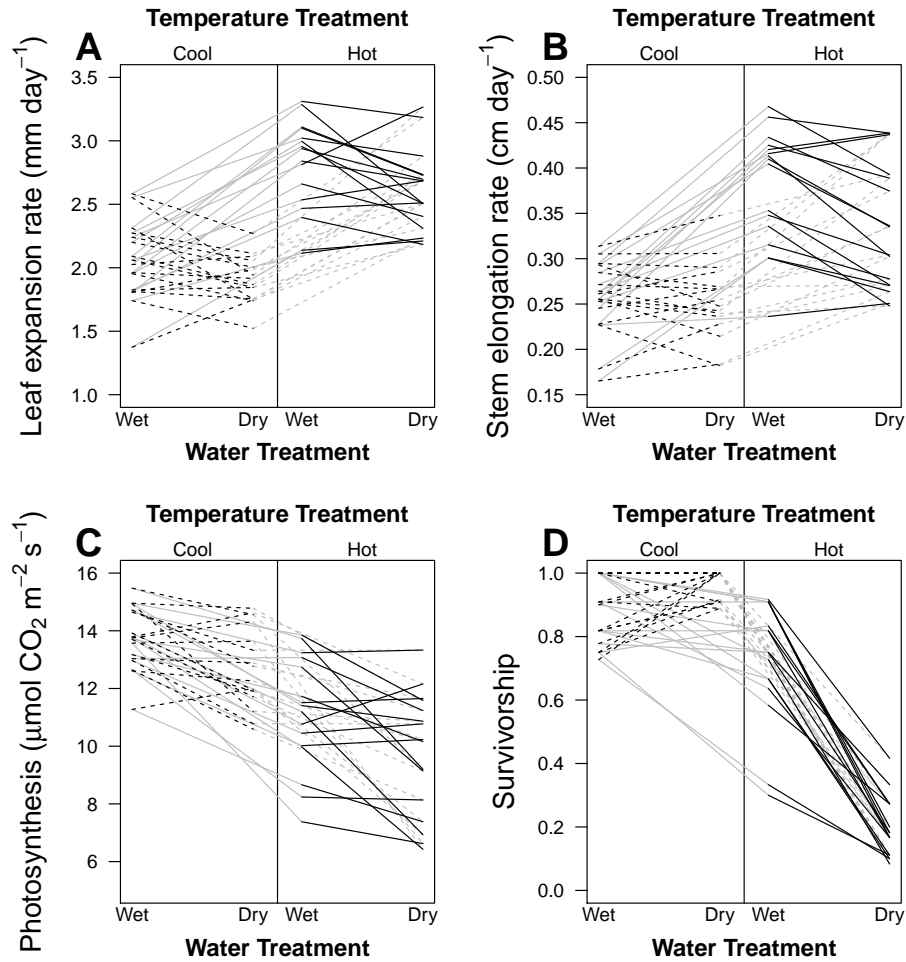

**Figure S5:** Reaction norms signify little Population  $\times$  Treatment interactions. For all panels, black lines represent population-level reaction norms from Wet to Dry in the Cool temperature treatment (dashed black lines) and Hot temperature treatment (solid black lines); gray lines represent reaction norms from Cool to Hot in the Wet treatment (solid gray lines) and Dry treatment (dashed gray lines). The responses shown are (A) leaf expansion rate, (B) stem elongation rate, (C) photosynthesis, and (D) survivorship (= 1 - mortality).

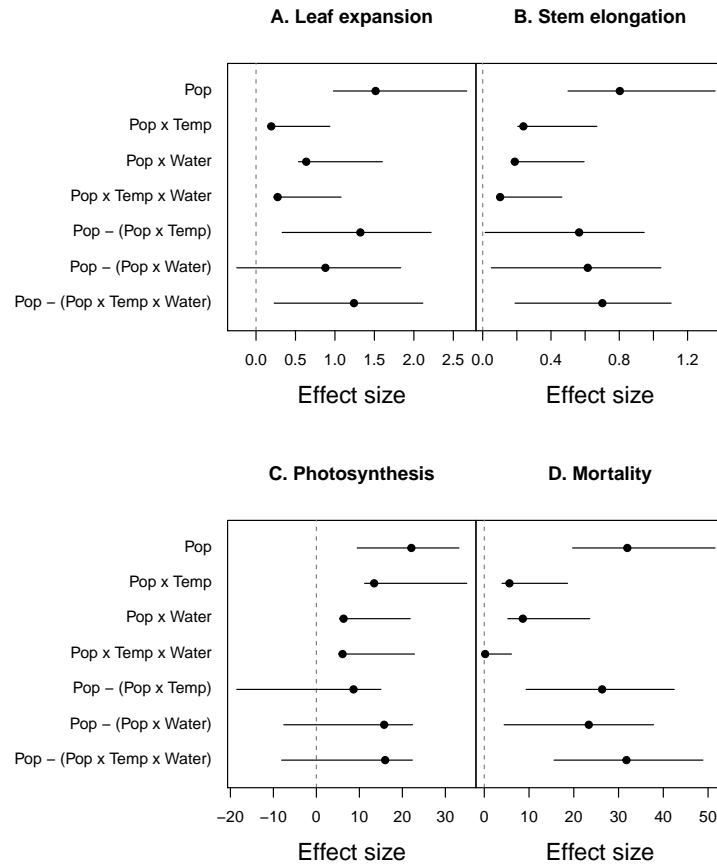

**Figure S6:** Population effect sizes are usually larger than Population  $\times$  Treatment effect sizes. In each panel, we plot estimated effect size (points) and 95% confidence intervals (lines) inferred using parametric bootstrap (see Materials and Methods). At the top, we plot the effect sizes of Population ('Pop'), two-way interactions between Population and Temperature ('Pop  $\times$  Temp') or Water ('Pop  $\times$  Water'), and the three-way interaction between Population, Temperature, and Water ('Pop  $\times$  Temp  $\times$  Water'). Below that we plot the difference in the Population minus the Population  $\times$  Treatment effect size (e.g. 'Pop - (Pop  $\times$  Temp)'). When confidence intervals do not overlap zero (dashed line), this means that Population has a significantly greater effect size than the interaction. Effect sizes were measured using unstandardized mean square error for linear mixed-effects models (leaf expansion, stem elongation, and photosynthesis) and  $\chi^2$  for GLMM (mortality). Hence, the effect size values are not comparable between different traits.

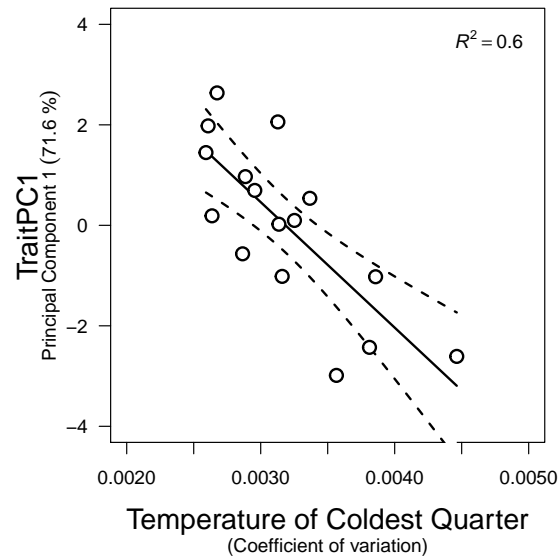

**Figure S7:** Trait variation, from fast to slow growth, is closely associated with neighborhood variation in temperature of the coldest quarter ( $\text{bio11}_\sigma$ ). Each point is a population coefficient of variation in  $\text{bio11}$  averaged over a 62-km climatic neighborhood (x-axis) and position along the slow to fast growth axis (y-axis), defined as Principal Component 1 of four traits (see Material and Methods). The line and 95% confidence intervals were estimated using linear regression.

## 713 **Supporting Material and Methods**

### 714 **Temperature treatments**

715 We simulated typical growing season (June 1 - August 15) air temperatures at the two most  
716 thermally divergent focal sites in our study, Whitewater Canyon (WWC, Hot) and Little  
717 Jameson (LIJ, Cool). We downloaded daily interpolated mean, minimum, and maximum  
718 air temperature from 13 years (2000-2012) at both sites from ClimateWNA (Wang et al.,  
719 2012). This range was chosen because seeds used in the experiment were collected around  
720 2012, thus their presence in that location at that time suggests that populations were able  
721 to persist there for at least some years before collection. Monthly temperatures from Cli-  
722 mateWNA are highly correlated with the air temperature recorded from data loggers in  
723 the field at these sites (A. Angert, unpub. data). Hence, the ClimateWNA temperature  
724 profiles are similar to actual thermal regimes experienced by *E. cardinalis* in nature. We  
725 simulated realistic temperature regimes by calculating the mean temperature trend from  
726 June to August using LOESS (Cleveland et al., 1992). The residuals were highly autocor-  
727 related at both sites (warmer than average days are typically followed by more warm days)  
728 and there was strong correlation ( $r = 0.65$ ) between sites (warm days in WWC were also  
729 warm in LIJ). The ‘VARselect’ function in the **vars** package for R (Pfaff, 2008) indicated  
730 that a lag two Vector Autoregression (VAR(2)) model best captured the within-site auto-  
731 correlation as well as between-site correlation in residuals. We fit and simulated from the  
732 VAR(2) model using the package **dse** (Gilbert, 2014) in R. Simulated data closely resem-  
733 bled the autocorrelation and between-site correlation of the actual data. From simulated  
734 mean temperature, we next selected minimum and maximum daily temperatures. Mean,  
735 min, and max temperature were highly correlated at both sites. We chose min and max  
736 temperatures using site-specific fitted linear models between mean, max, and min tem-  
737 perature, with additional variation given by normally distributed random deviates with  
738 variance equal to the residual variance of the linear models. For each day, the nighttime

739 (22:00 - 6:00) chamber temperature was set to the simulated minimum temperature. Dur-  
740 ing the middle of the day, temperature was set to the simulated maximum temperature,  
741 with a variable period of transition between min and max so that the average temperature  
742 was equal the simulated mean temperature.

### 743 **Watering treatments**

744 For watering treatments, we simulated two extreme types of streams where *E. cardinalis*  
745 grows. In the well-watered treatment, we simulated a large stream that never goes dry  
746 during the summer growing season. In the drought treatment, we simulated a small stream  
747 that has ample flow at the beginning of the season due to rain and snow melt, but gradually  
748 dries down through the summer. In both treatments, plants were bottom-watered using  
749 water chilled to 7.5°C. Plants in the well-watered treatment were fully saturated every two  
750 hours during the day. Watering in the drought treatment gradually declined from every  
751 two hours to every day between May 20 (36 days after sowing) and 10 June (57 days after  
752 sowing). Simultaneously, the amount of bottom-watering per flood decreased, such that  
753 only the bottom of the cone-tainers were wetted by the end of the experiment.
